# Supplementary material
Source: PubMed Central journal article supplement (PMC4207532)

## Supporting Information for:

Selenorhodamine Photosensitizers for Photodynamic Therapy of P-glycoprotein-expressing Cells

Jacqueline E. Hill, Michelle K. Linder, Kellie S. Davies, Geri A. Sawada, Janet Morgan, Tymish Y. Ohulchansky, and Michael R. Detty\*

| <b><u>Table of Contents</u></b>                                                                                              | <b><u>Page</u></b> |
|------------------------------------------------------------------------------------------------------------------------------|--------------------|
| <b>Figure S1.</b> Electronic absorption spectra of <b>15b-18b</b> in methanol.                                               | S2                 |
| <b>Figure S2.</b> Decays of luminescence from $^1\text{O}_2$ sensitized by compounds <b>15b-18b</b>                          | S6                 |
| <b>Figure S3.</b> Flow cytometry data for Colo-26 cells incubated with <b>15a-18a</b> and with and without verapamil.        | S7                 |
| <b>Figure S4.</b> Flow cytometry data for Colo-26 cells incubated with <b>15b-18b</b> and with and without verapamil.        | S8                 |
| <b>Figure S5.</b> Phototoxicity of 0.5 $\mu\text{M}$ <b>15a-18a</b> toward Colo-26 cells.                                    | S9                 |
| <b>Figure S6.</b> Phototoxicity of <b>15b-18b</b> toward Colo-26 cells with laser light                                      | S10                |
| <b>Figure S7.</b> Dark toxicity of <b>15b-18b</b> toward Colo-26 cells                                                       | S11                |
| <b>Figure S8.</b> Combination treatment of Colo-26 cells with doxorubicin and <b>15b-18b</b>                                 | S12                |
| <b>Figure S9.</b> Representative examples of <b>MTG/9-Se</b> -stained cells (a-d) and <b>MTG/10-Se</b> -stained cells (e-h). | S13                |
| <b>Figure S10.</b> Representative examples of <b>MTG/11-Se</b> -stained cells (a-d).                                         | S14                |
| $^1\text{H}$ and $^{13}\text{C}$ NMR spectral data for compounds <b>15b-18b</b>                                              | S15-S32            |

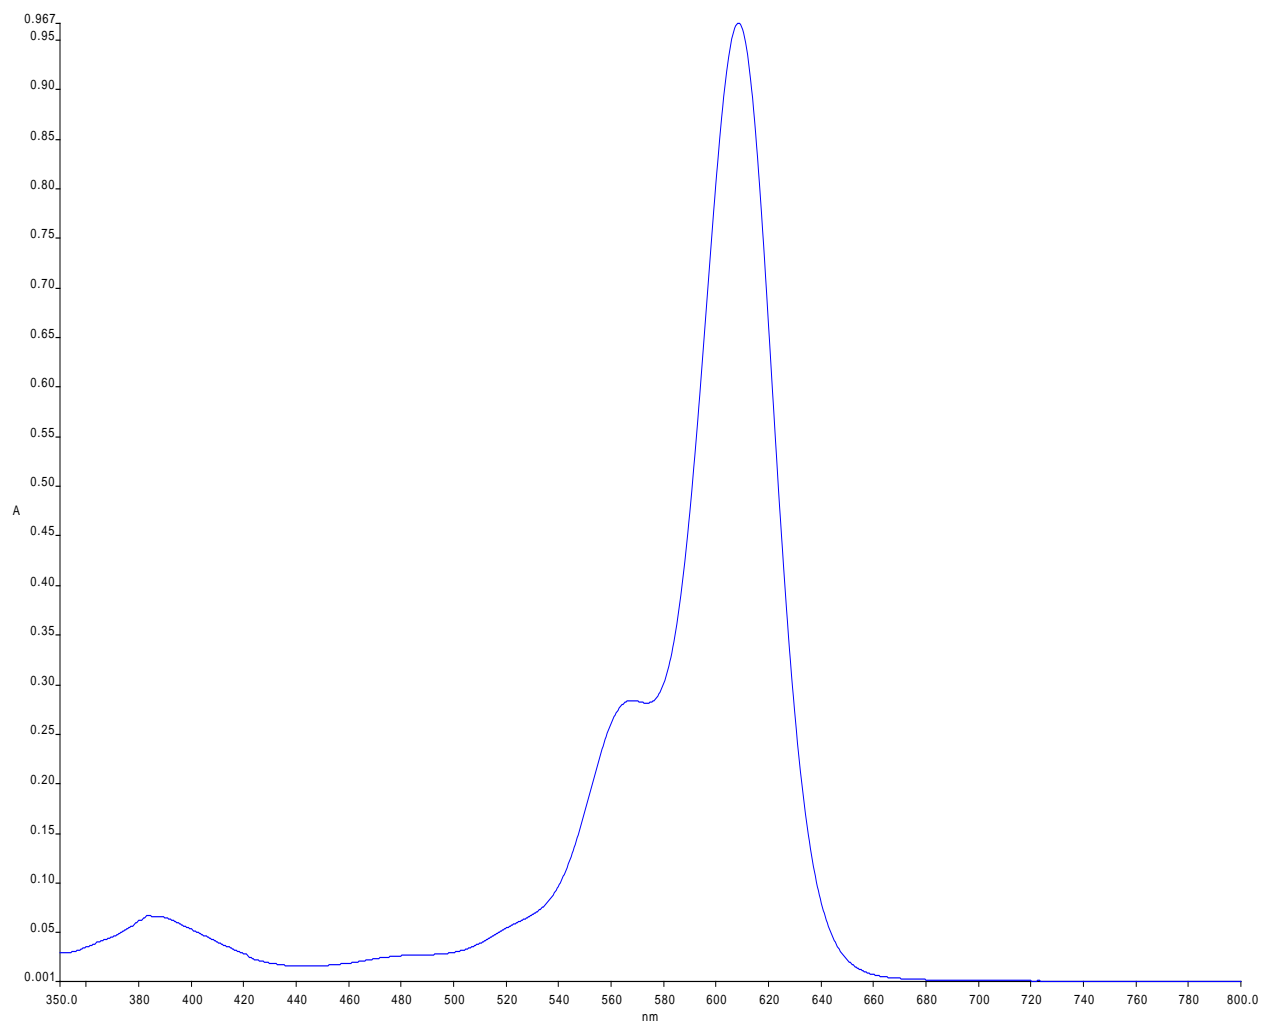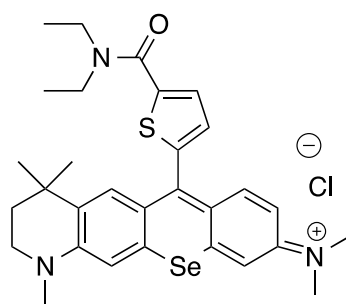

**9-Se**  
**I-JH-068**  
**608.23 nm 0.96676**

**Figure S1a.** Electronic absorption spectrum of **9-Se** in MeOH.

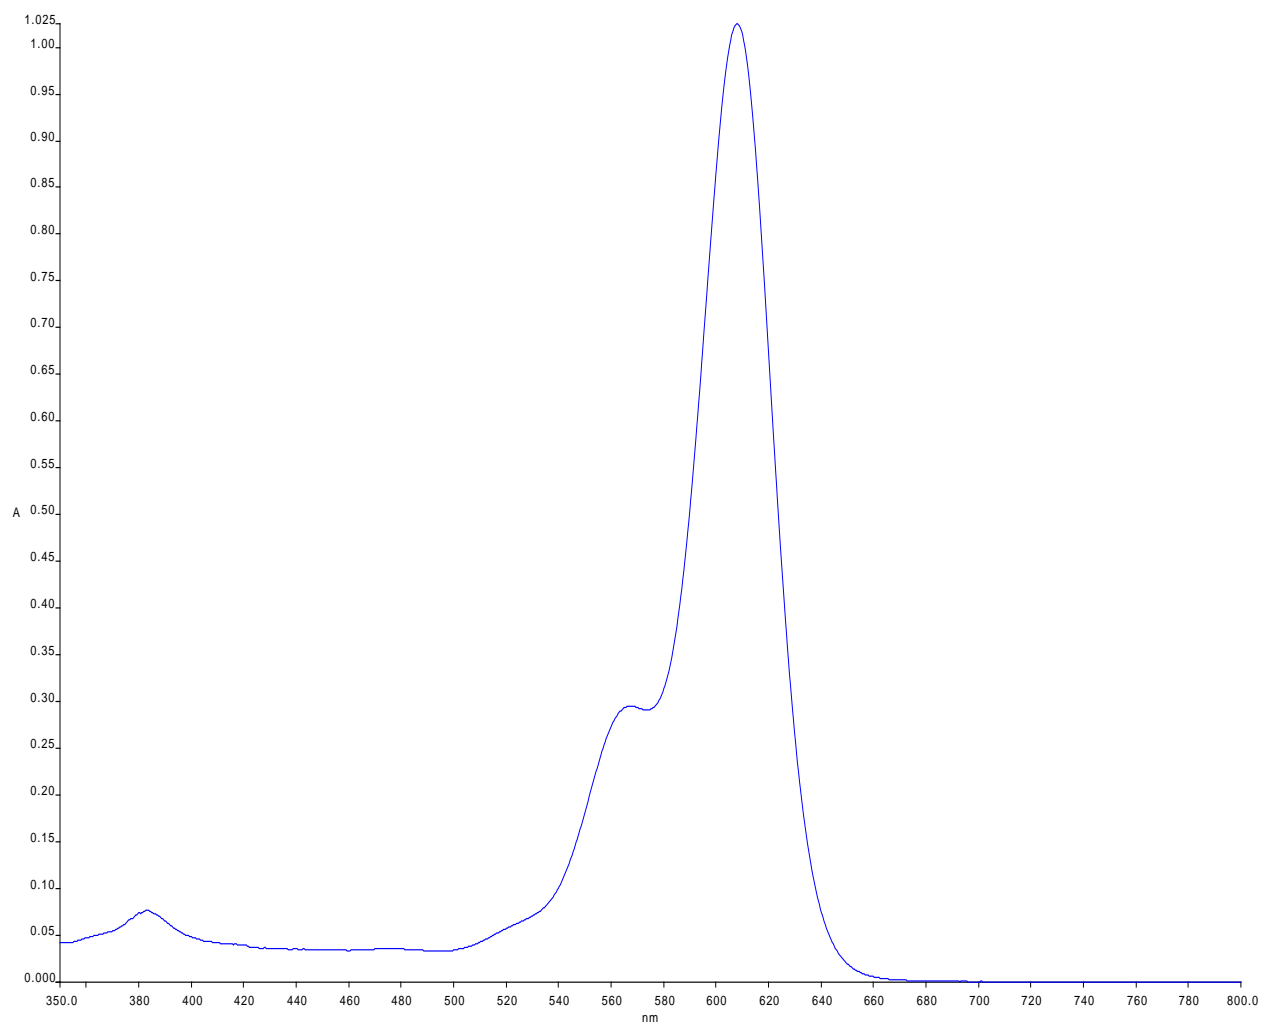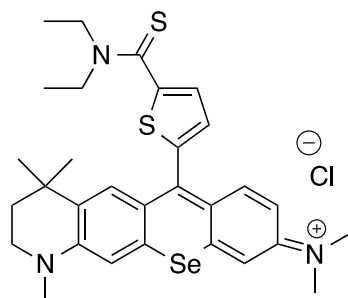

**10-Se**  
**I-JH-066**  
**608.23 nm 1.0246**

**Figure S1b.** Electronic absorption spectrum of **10-Se** in MeOH.

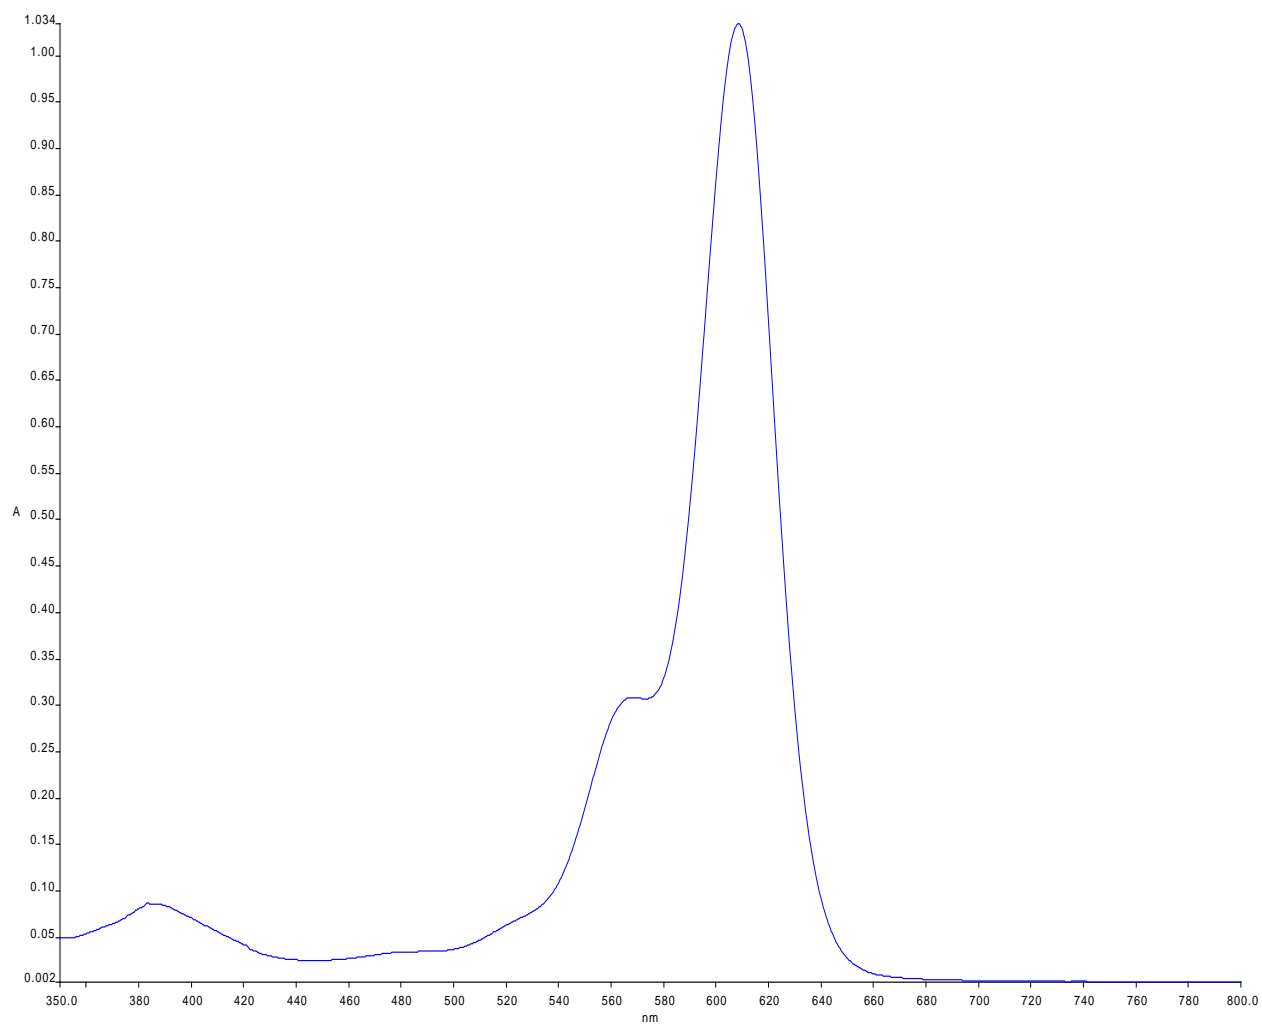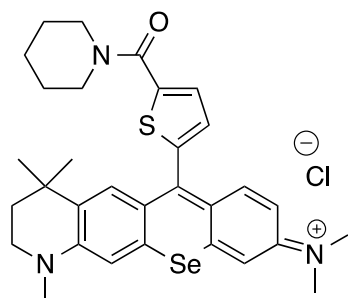

**11-Se**  
**I-JH-174**  
**608.23 nm 1.0342**

**Figure S1c.** Electronic absorption spectrum of **11-Se** in MeOH.

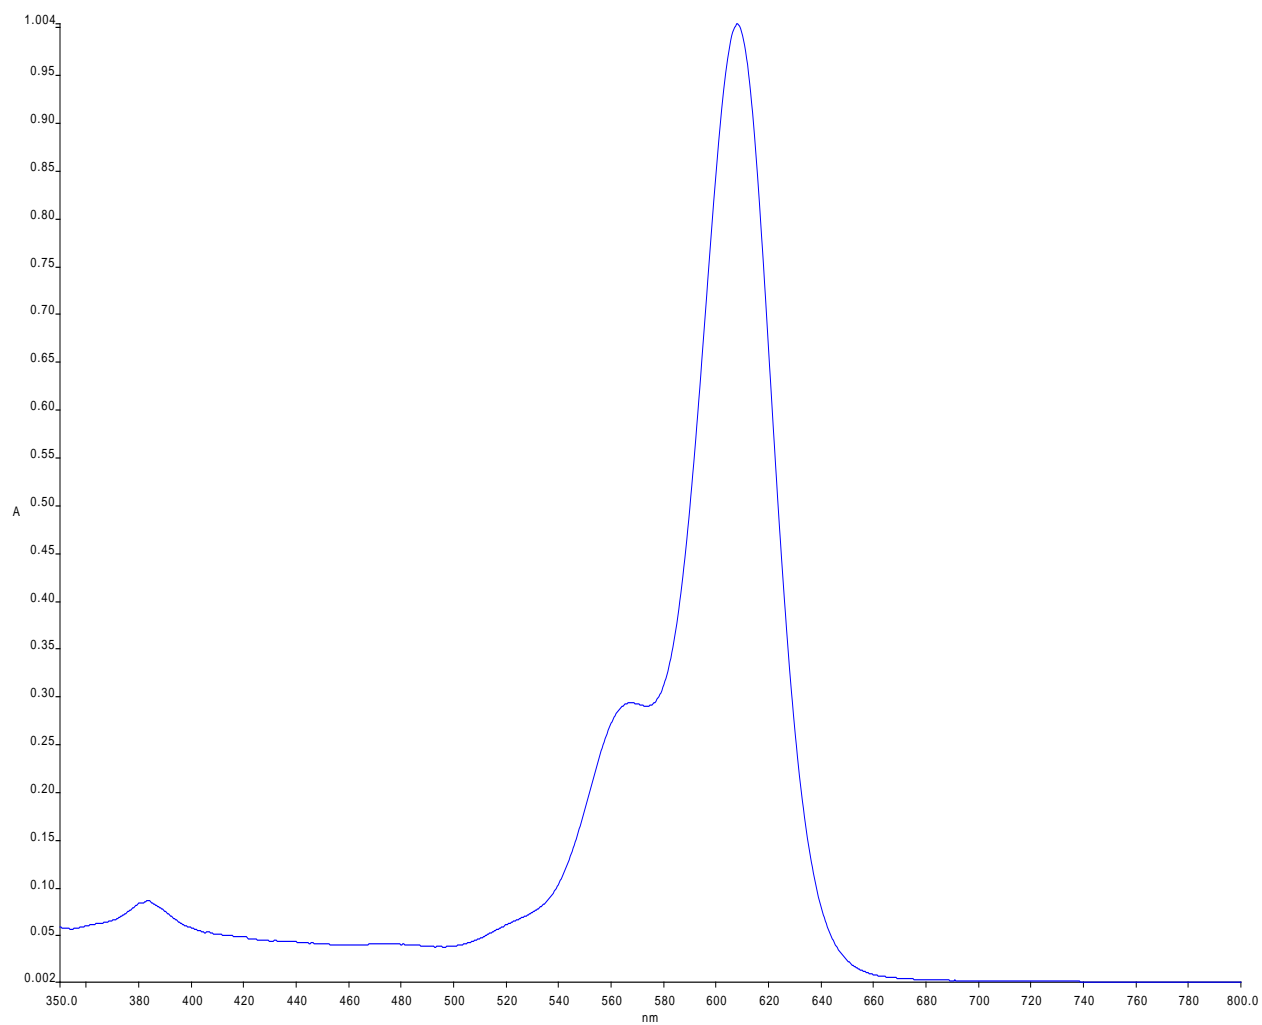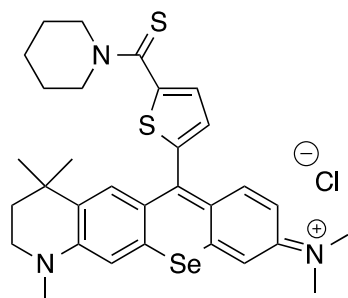

**12-Se**  
**I-JH-072**  
**608.23 nm 1.0036**

**Figure S1d.** Electronic absorption spectrum of **12-Se** in MeOH.

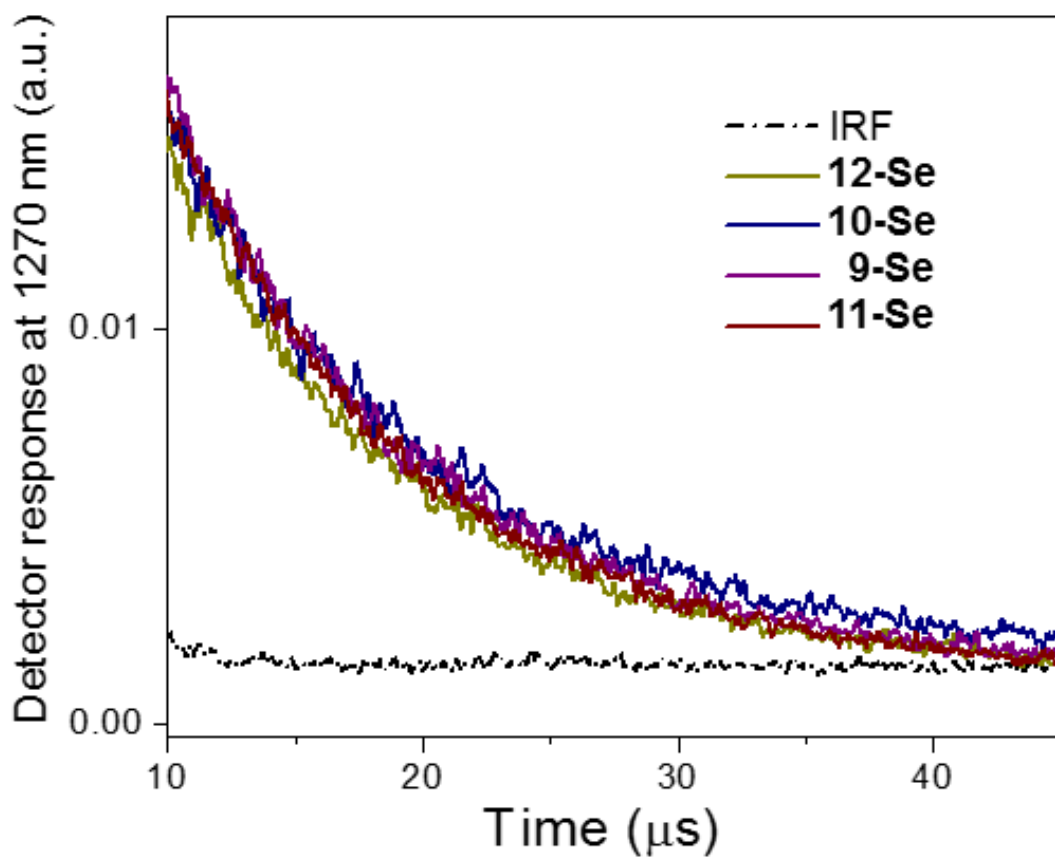

**Figure S2.** Decays of luminescence from  $^1\text{O}_2$  sensitized by compounds **15b-18b** used for determination of  $\Phi(^1\text{O}_2)$ . Signal obtained from air-saturated MeOH in the cuvette was used as the instrument response function (IRF).

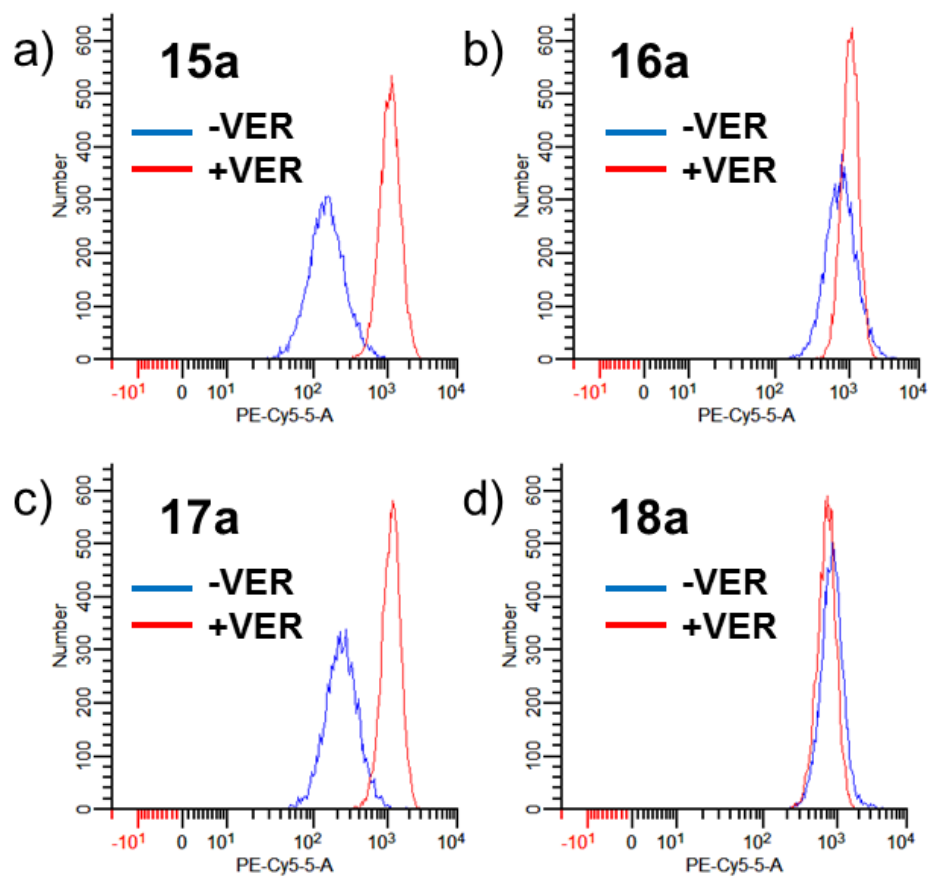

**Figure S3.** Flow cytometry data for Colo-26 cells incubated 1 h with  $2 \times 10^{-7}$  M **15a-18a** and with or without  $1 \times 10^{-4}$  M verapamil (VER). The histograms show the shift in fluorescence from dye alone (blue) and dye plus verapamil (red).

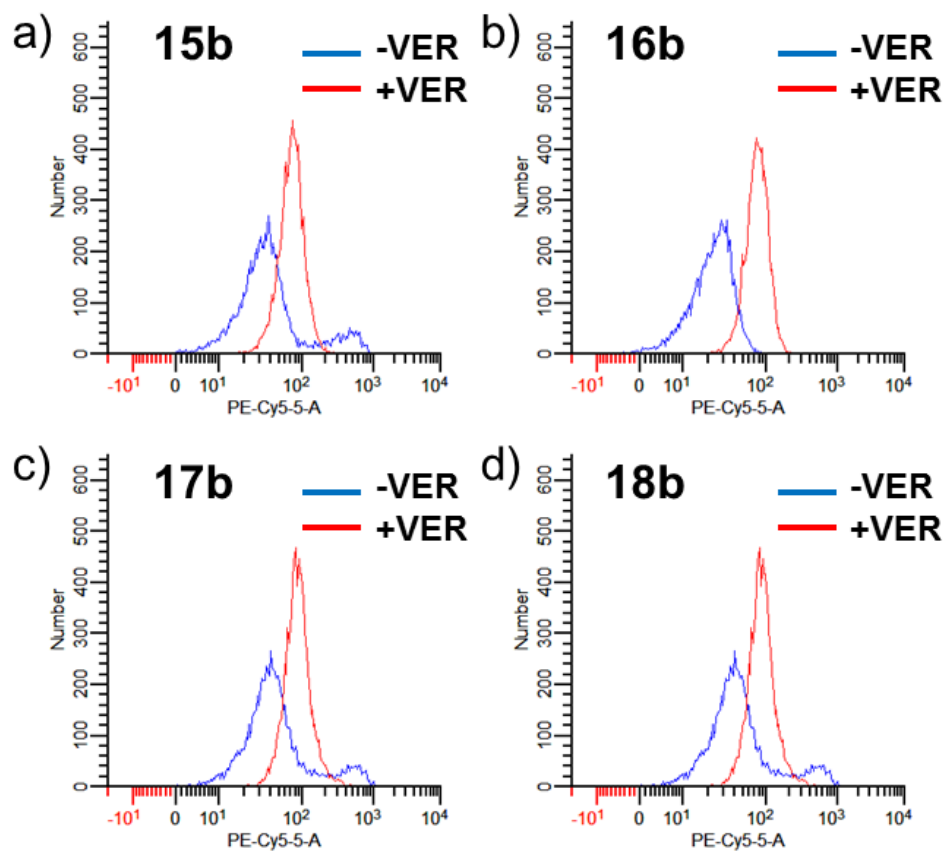

**Figure S4.** Flow cytometry data for Colo-26 cells incubated 1 h with  $2 \times 10^{-7}$  M **15b-18b** and with or without  $1 \times 10^{-4}$  M verapamil (VER). The histograms show the shift in fluorescence from dye alone (blue) and dye plus verapamil (red).



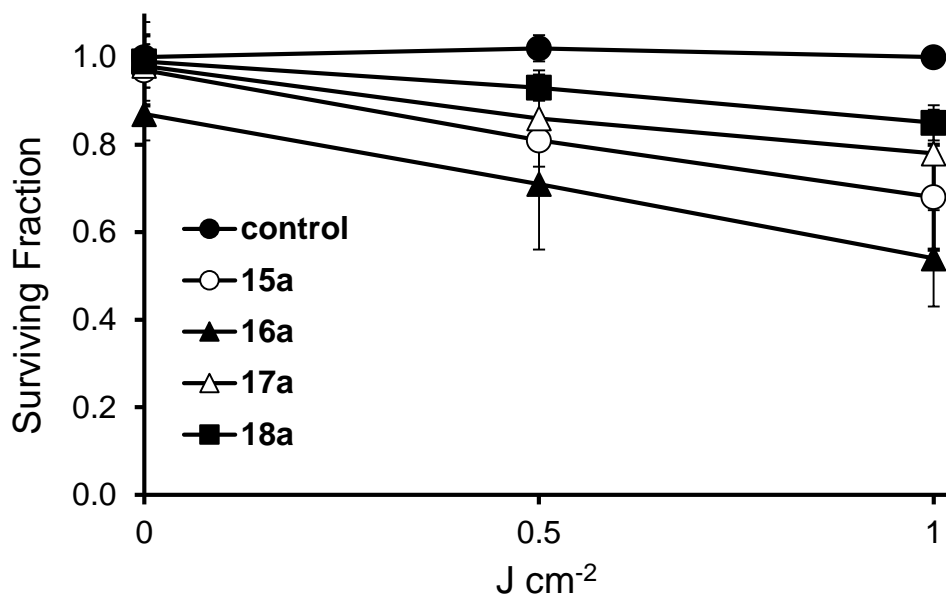

**Figure S5.** Phototoxicity of 0.5  $\mu\text{M}$  **15a-18a** toward Colo-26 cells with 0.5  $\text{J cm}^{-2}$  or 1.0  $\text{J cm}^{-2}$  of 350-700-nm light. Error bars are  $\pm$  SD.

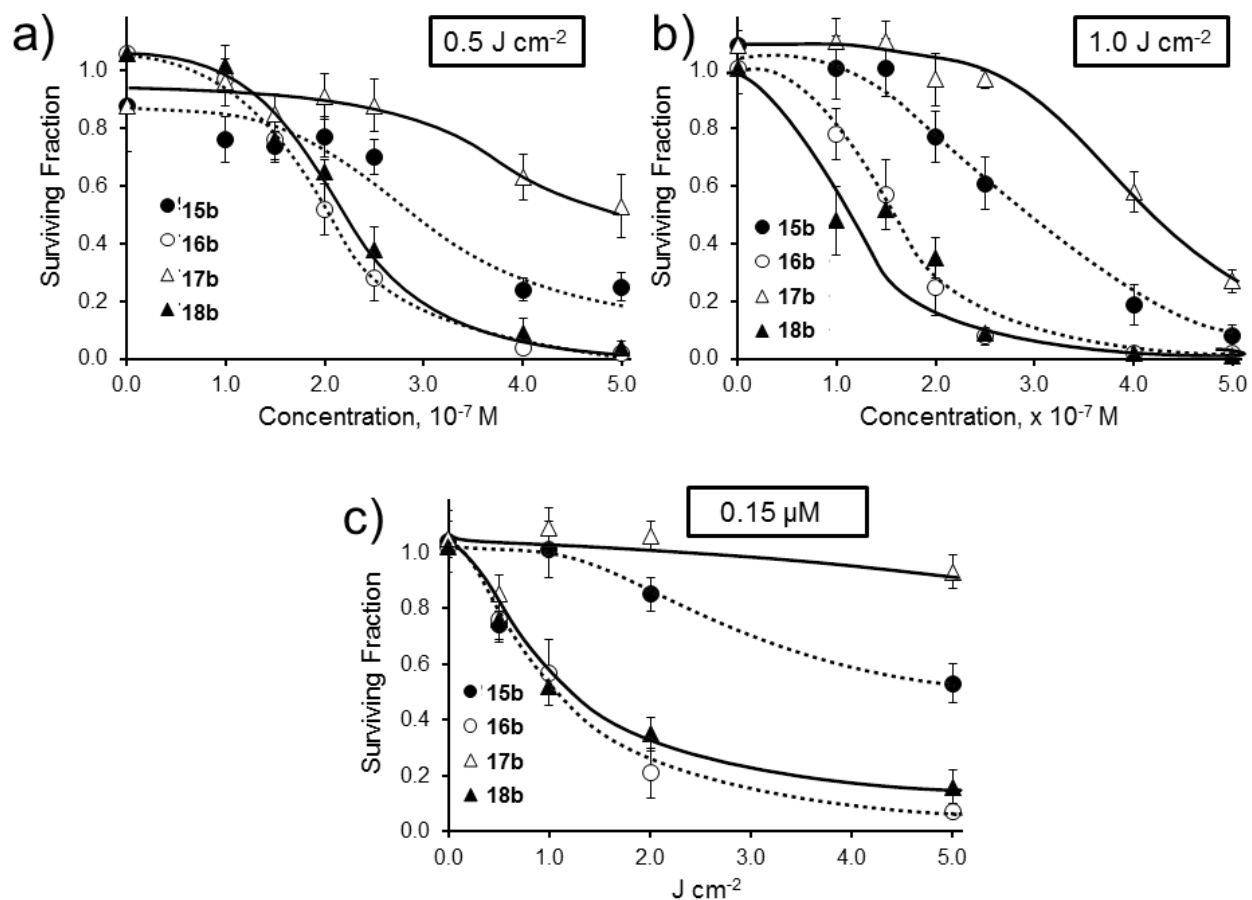

**Figure S6.** Phototoxicity of **15b-18b** toward Colo-6 cells with irradiation from a tunable dye laser. Irradiation at  $611 \pm 2$  nm for **15b** and **17b** and  $613 \pm 2$  nm for **16b** and **18b** delivered at 3.2 mW  $\text{cm}^{-2}$  for varying selenorhodamine concentration and a) 0.5 J  $\text{cm}^{-2}$  of light and b) 1.0 J  $\text{cm}^{-2}$  of light and c) for 0.15  $\mu\text{M}$  **15b-18b** and varying light doses from 0 to 5 J  $\text{cm}^{-2}$ . Values of  $\text{EC}_{50}$  were determined by sigmoidal dose-response (variable slope) analysis. Error bars are  $\pm$  SD.

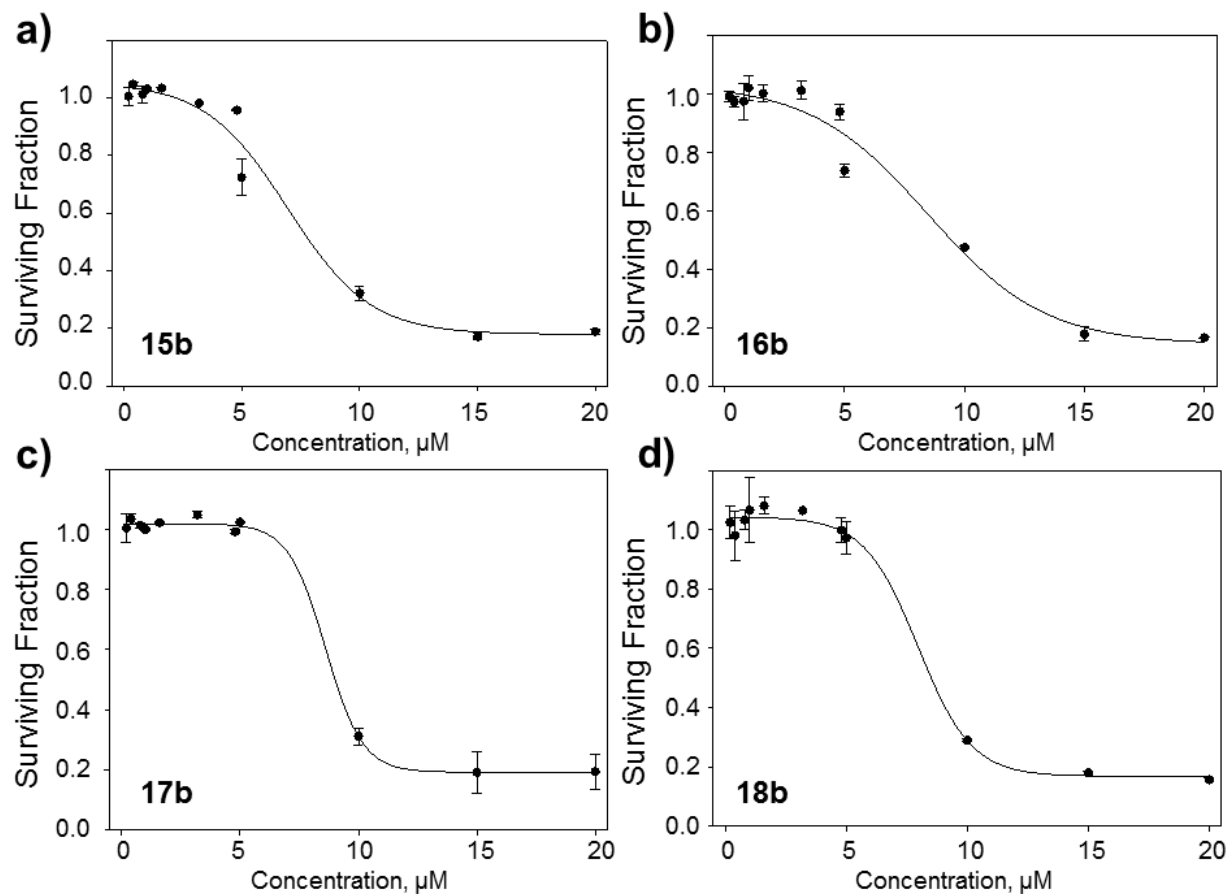

**Figure S7.** Dark toxicity of **15b-18b** toward Colo-26 cells. Error bars are  $\pm$  SD. Values of  $\text{LD}_{50}$  were determined by a sigmoidal dose-response (variable slope) analysis.

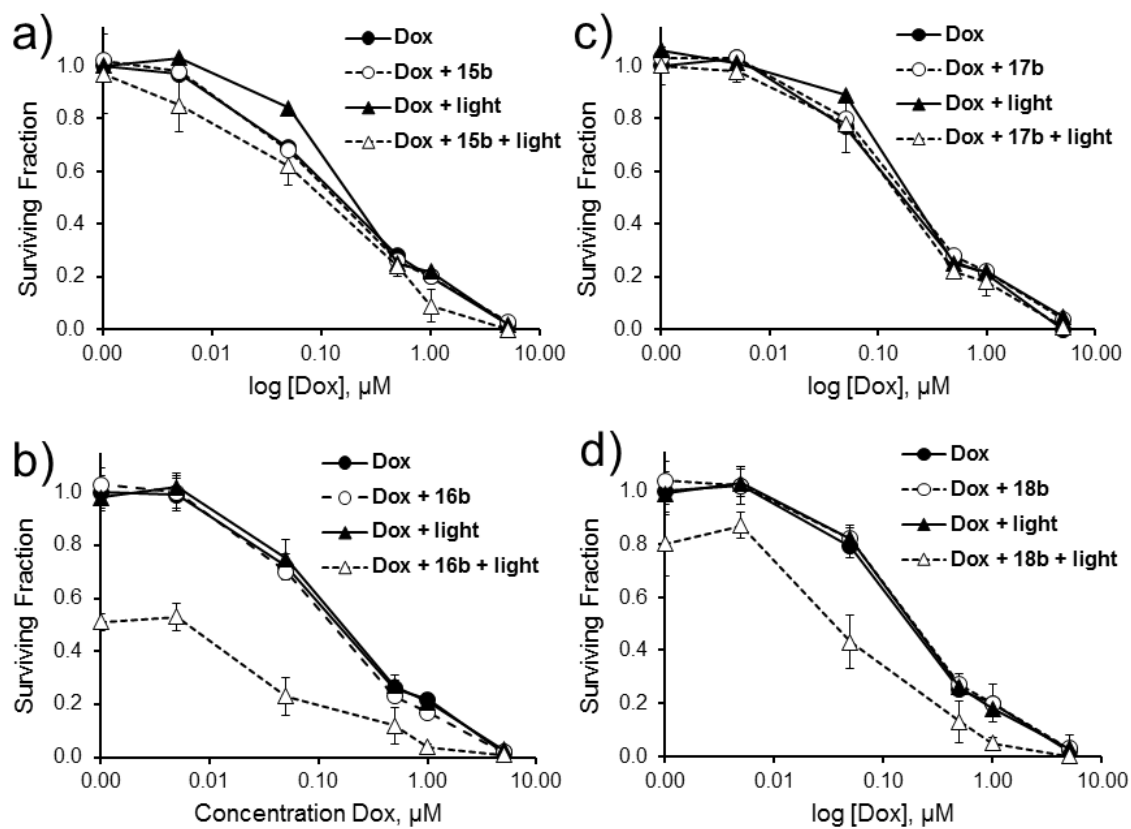

**Figure S8.** Combination treatment of Colo-26 cells with various concentrations of doxorubicin (Dox) alone or in combination with a) **15b** (0.15  $\mu\text{M}$ ), b) **16b** (0.15  $\mu\text{M}$ ), c) **17b** (0.15  $\mu\text{M}$ ), or d) **18b** (0.15  $\mu\text{M}$ ) in the dark or with 1.0  $\text{J cm}^{-2}$  of 611-nm (for **16b** and **18b**) or 613-nm light (for **15-b** or **17b**). Values are the mean of six replicates. Error bars are  $\pm$  SD.

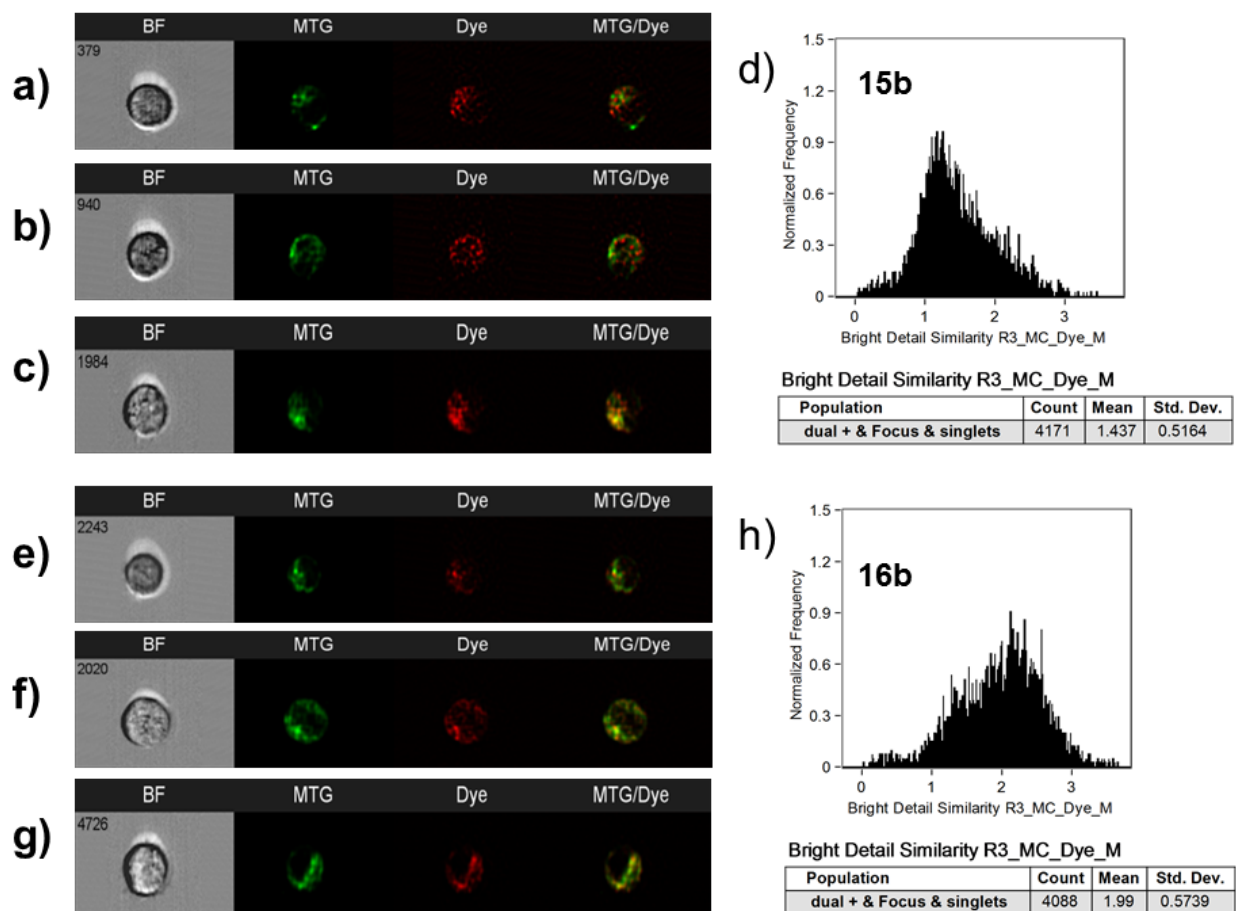

**Figure S9.** Representative examples of MTG/**15b**-stained cells as a bright field image (BF), MTG fluorescence (MTG), **15b** fluorescence (Dye), and a merged image of MTG/**15b** fluorescence (MTG/Dye) for cells with a) low similarity, b) intermediate similarity, and c) high similarity. d) A histogram of the pixel-by-pixel statistical analysis of each cell ( $n = 4200$ ) analyzed, in which the y-axis is number of cells and the x-axis is the similarity coefficient between MTG and **15b**.

Representative examples of MTG/**16b**-stained cells as a bright field image (BF), MTG fluorescence (MTG), **10-Se** fluorescence (Dye), and a merged image of MTG/**16b** fluorescence (MTG/Dye) for cells with e) low similarity, f) intermediate similarity, and g) high similarity. h) A histogram of the pixel-by-pixel statistical analysis of each cell ( $n = 4100$ ) analyzed, in which the y-axis is number of cells and the x-axis is the similarity coefficient between MTG and **16b**.

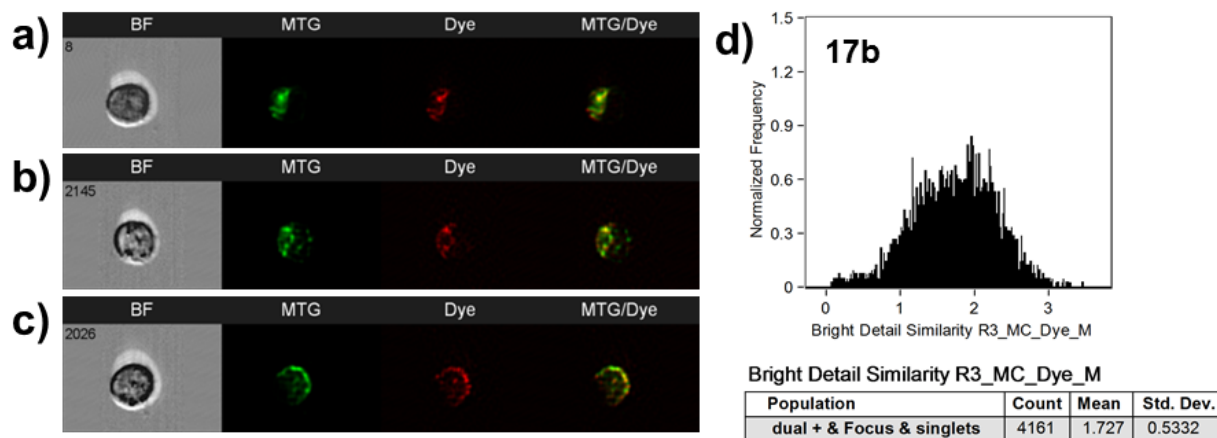

**Figure S10.** Representative examples of MTG/**17b**-stained cells as a bright field image (BF), MTG fluorescence (MTG), **17b** fluorescence (Dye), and a merged image of MTG/**17b** fluorescence (MTG/Dye) for cells with a) low similarity, b) intermediate similarity, and c) high similarity. d) A histogram of the pixel-by-pixel statistical analysis of each cell ( $n = 4200$ ) analyzed, in which the y-axis is number of cells and the x-axis is the similarity coefficient between MTG and **17b**.

I-JH-045

Sample Name:

Data Collected on:  
chemnmr500.chem.buffalo.edu-inova500  
Archive directory:

Sample directory:

FidFile: 1-JH-045

Pulse Sequence: PROTON (s2pul)  
Solvent: cd3cn  
Data collected on: Aug 15 2012

Temp. 25.0 C / 298.1 K  
Operator: Detty

Relax. delay 1.000 sec  
Pulse 45.0 degrees  
Acq. time 2.048 sec  
Width 8000.0 Hz  
8 repetitions  
OBSERVE H1, 499.9010665 MHz  
DATA PROCESSING  
Line broadening 0.1 Hz  
FT size 32768  
Total time 0 min 24 sec

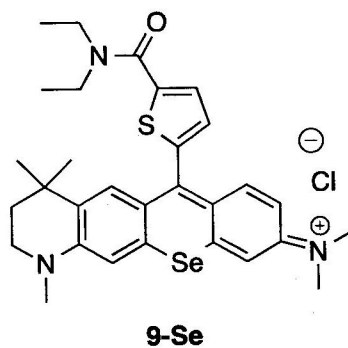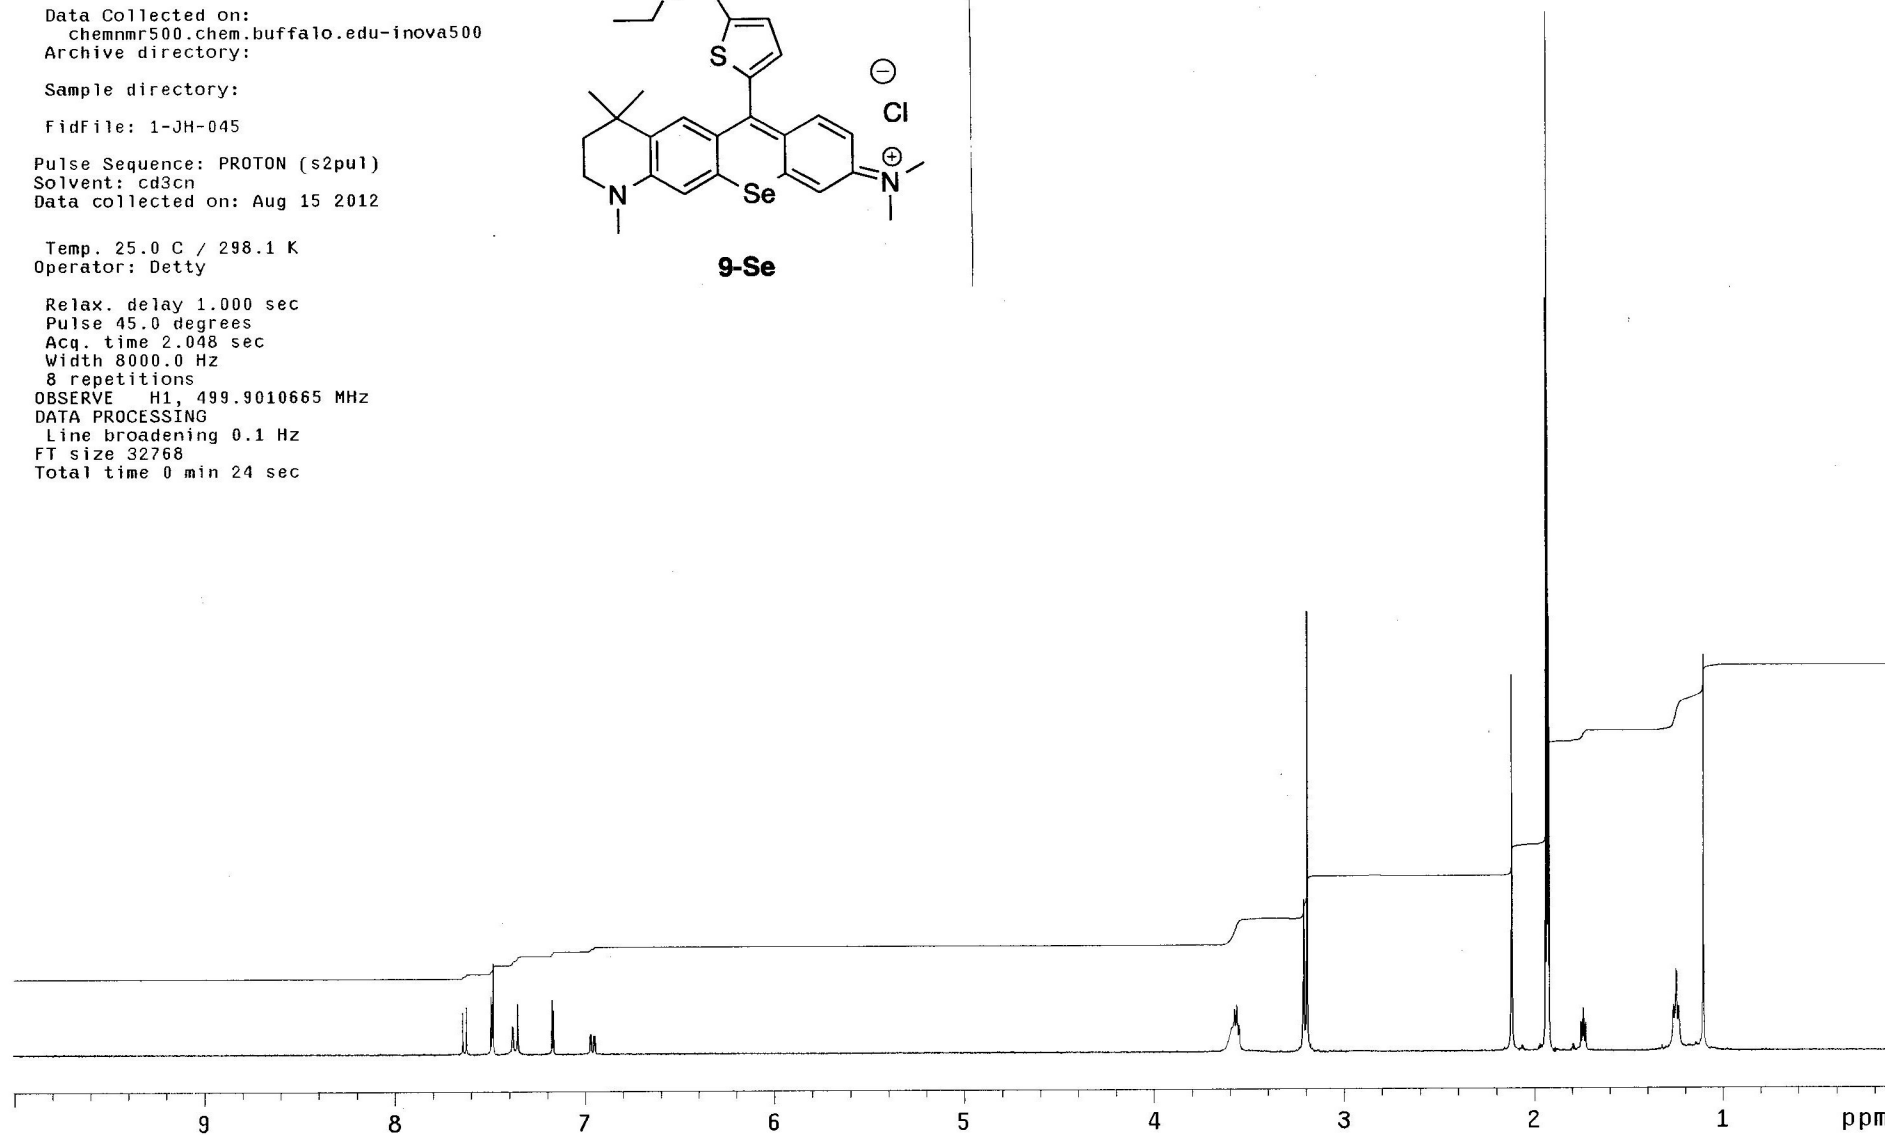

1-JH-045

Sample Name:

Data Collected on:  
chemnmr500.chem.buffalo.edu-inova500  
Archive directory:

Sample directory:

FidFile: 1-JH-045-2

Pulse Sequence: PROTON (s2pu1)  
Solvent: cd3cn  
Data collected on: Aug 16 2012

Temp. 25.0 C / 298.1 K  
Operator: Detty

Relax. delay 1.000 sec  
Pulse 45.0 degrees  
Acq. time 2.048 sec  
Width 8000.0 Hz  
8 repetitions  
OBSERVE H1, 499.9010665 MHz  
DATA PROCESSING  
Line broadening 0.1 Hz  
FT size 32768  
Total time 0 min 24 sec

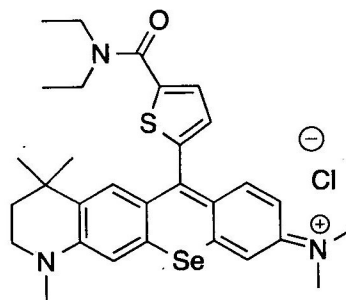

9-Se

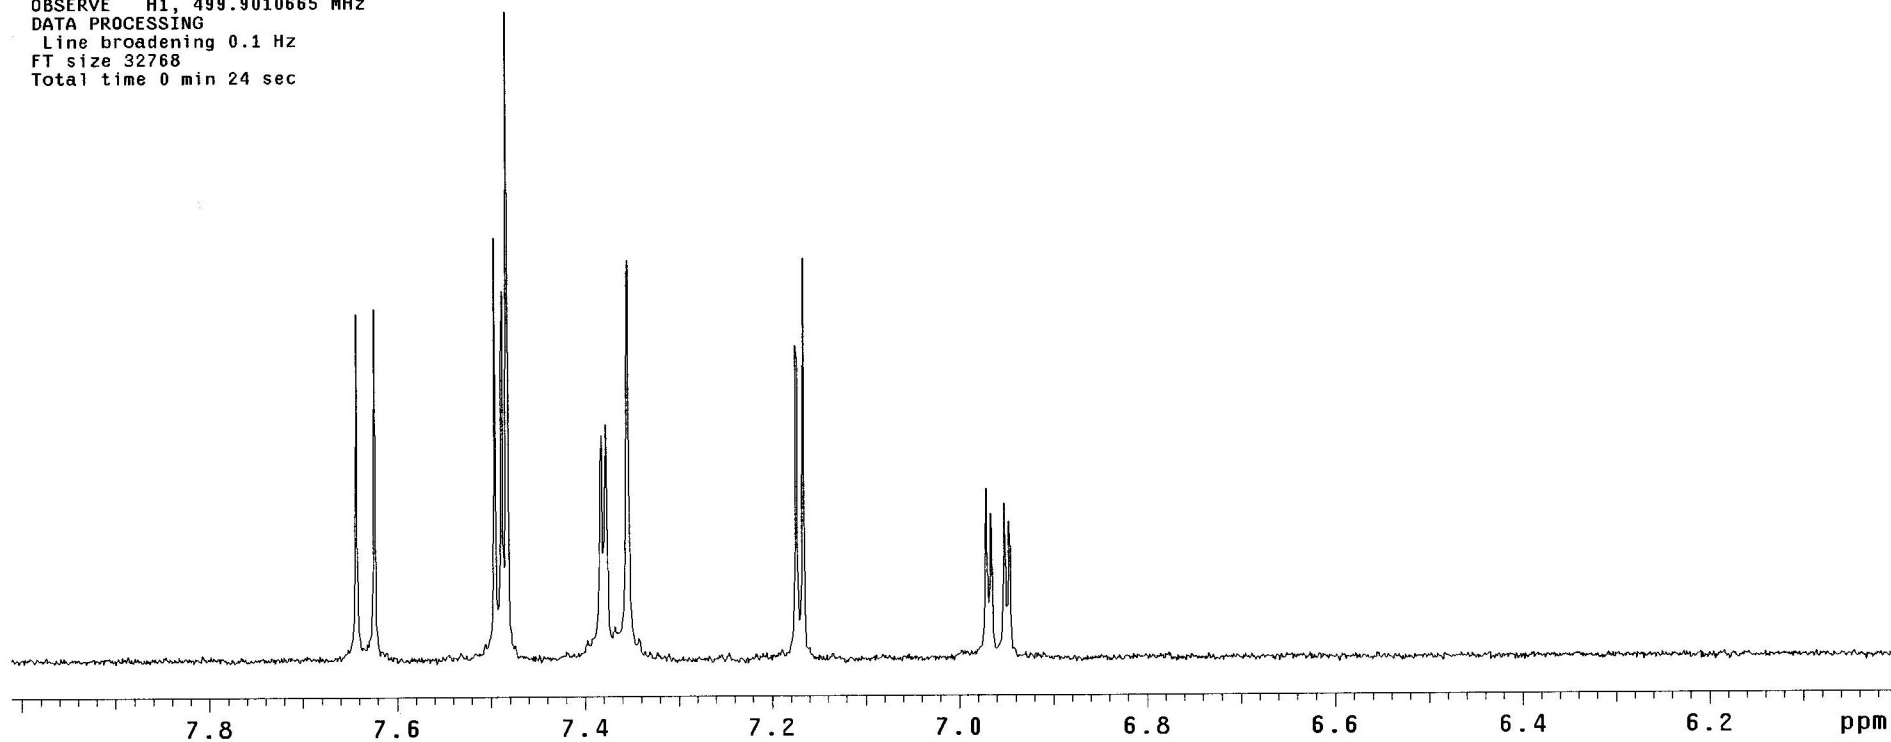



I-JH-045C1-saltcarbon

Sample Name:

Data Collected on:  
roesy.chem.buffalo.edu-mercury300  
Archive directory:

Sample directory:

FidFile: I-JH-045C1-saltcarbon

Pulse Sequence: CARBON (s2pu1)  
Solvent: cdc13  
Data collected on: Jul 26 2013

Temp. 25.0 C / 298.1 K  
Operator: Detty

Relax. delay 1.000 sec  
Pulse 45.0 degrees  
Acq. time 0.868 sec  
Width 18867.9 Hz  
2304 repetitions  
OBSERVE C13, 75.4536435 MHz  
DECOUPLE H1, 300.0754430 MHz  
Power 38 dB  
continuously on  
WALTZ-16 modulated  
DATA PROCESSING  
Line broadening 0.5 Hz  
FT size 32768  
Total time 536 hr, 56 min

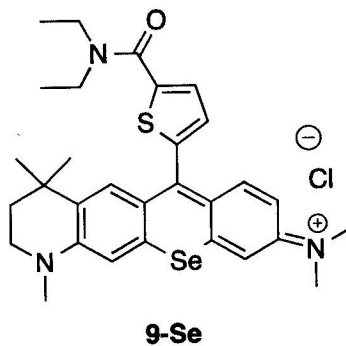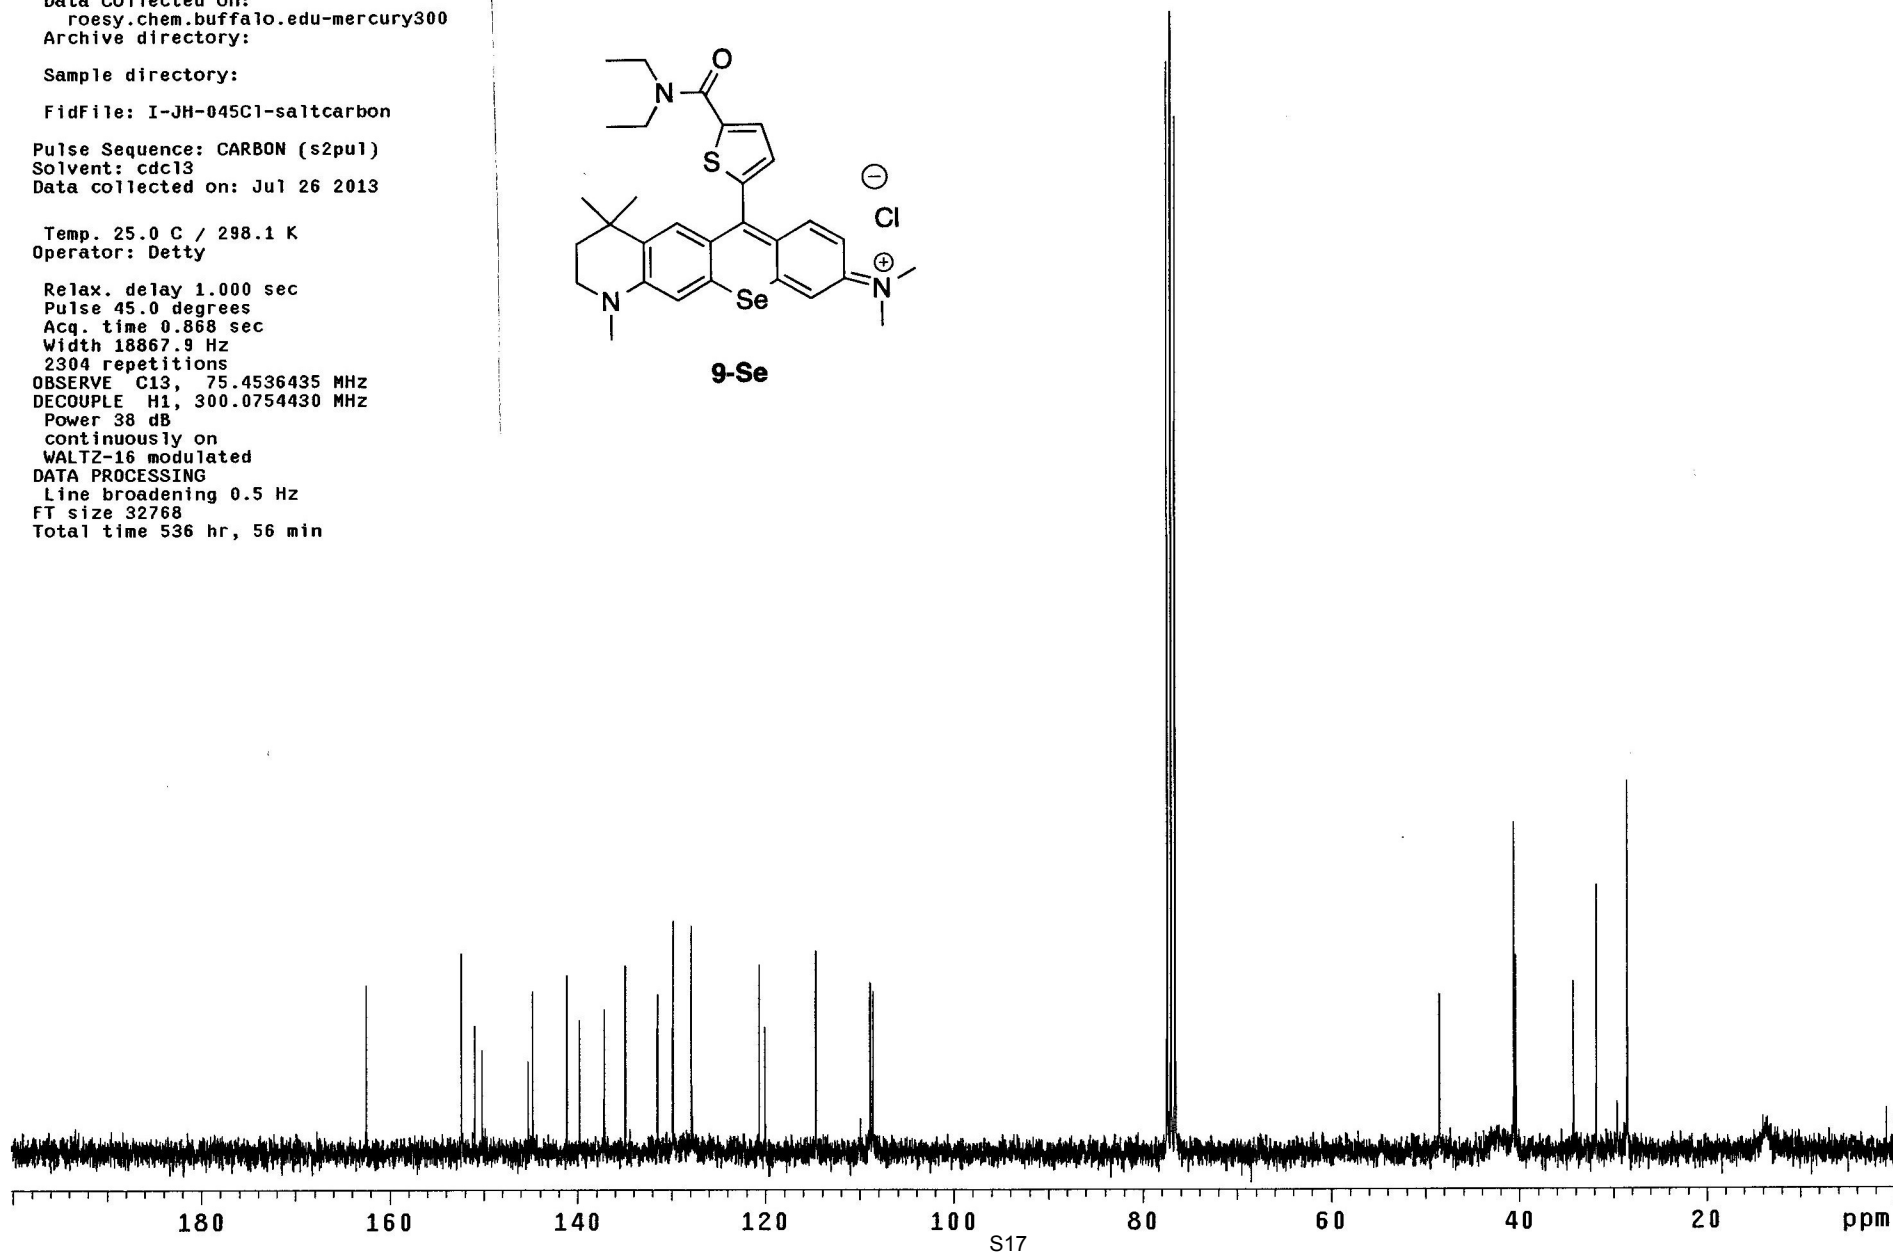

I-JH-045C1-saltcarbon

Sample Name:

Data Collected on:  
roesy.chem.buffalo.edu-mercury300  
Archive directory:

Sample directory:

FidFile: I-JH-045C1-saltcarbon

Pulse Sequence: CARBON (s2pu1)  
Solvent: cdc13  
Data collected on: Jul 26 2013

Temp. 25.0 C / 298.1 K  
Operator: Detty

Relax. delay 1.000 sec  
Pulse 45.0 degrees  
Acq. time 0.868 sec  
Width 18867.9 Hz  
2304 repetitions  
OBSERVE C13, 75.4536435 MHz  
DECOUPLE H1, 300.0754430 MHz  
Power 38 dB  
continuously on  
WALTZ-16 modulated  
DATA PROCESSING  
Line broadening 0.5 Hz  
FT size 32768  
Total time 536 hr, 56 min

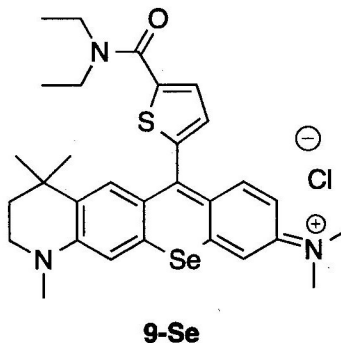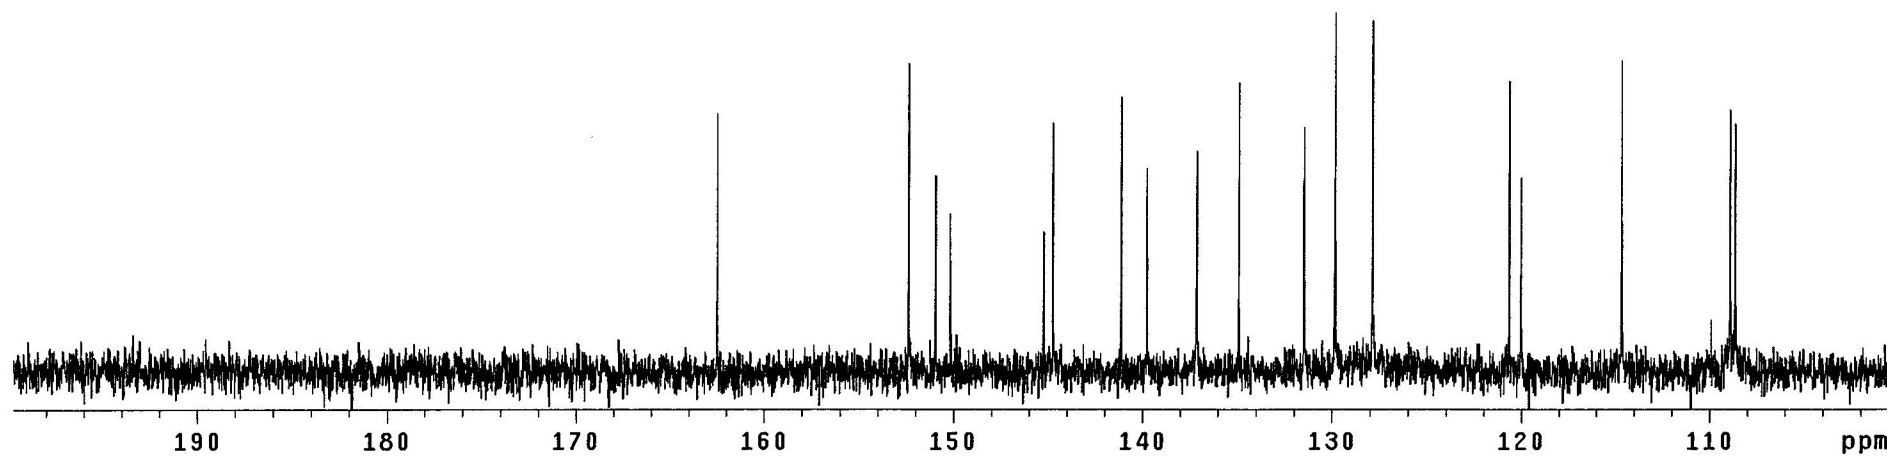

1-JH-039pure

Sample Name:

Data Collected on:  
chemnmr500.chem.buffalo.edu-inova500  
Archive directory:

Sample directory:

FidFile: 1-JH-039pure

Pulse Sequence: PROTON (s2pu1)  
Solvent: cd2c12  
Data collected on: Jul 26 2012

Temp. 25.0 C / 298.1 K  
Operator: Detty

Relax. delay 1.000 sec  
Pulse 45.0 degrees  
Acq. time 2.048 sec  
Width 8000.0 Hz  
8 repetitions  
OBSERVE H1, 499.8993732 MHz  
DATA PROCESSING  
Line broadening 0.1 Hz  
FT size 32768  
Total time 0 min 24 sec

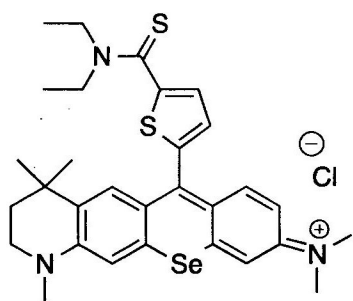

10-Se

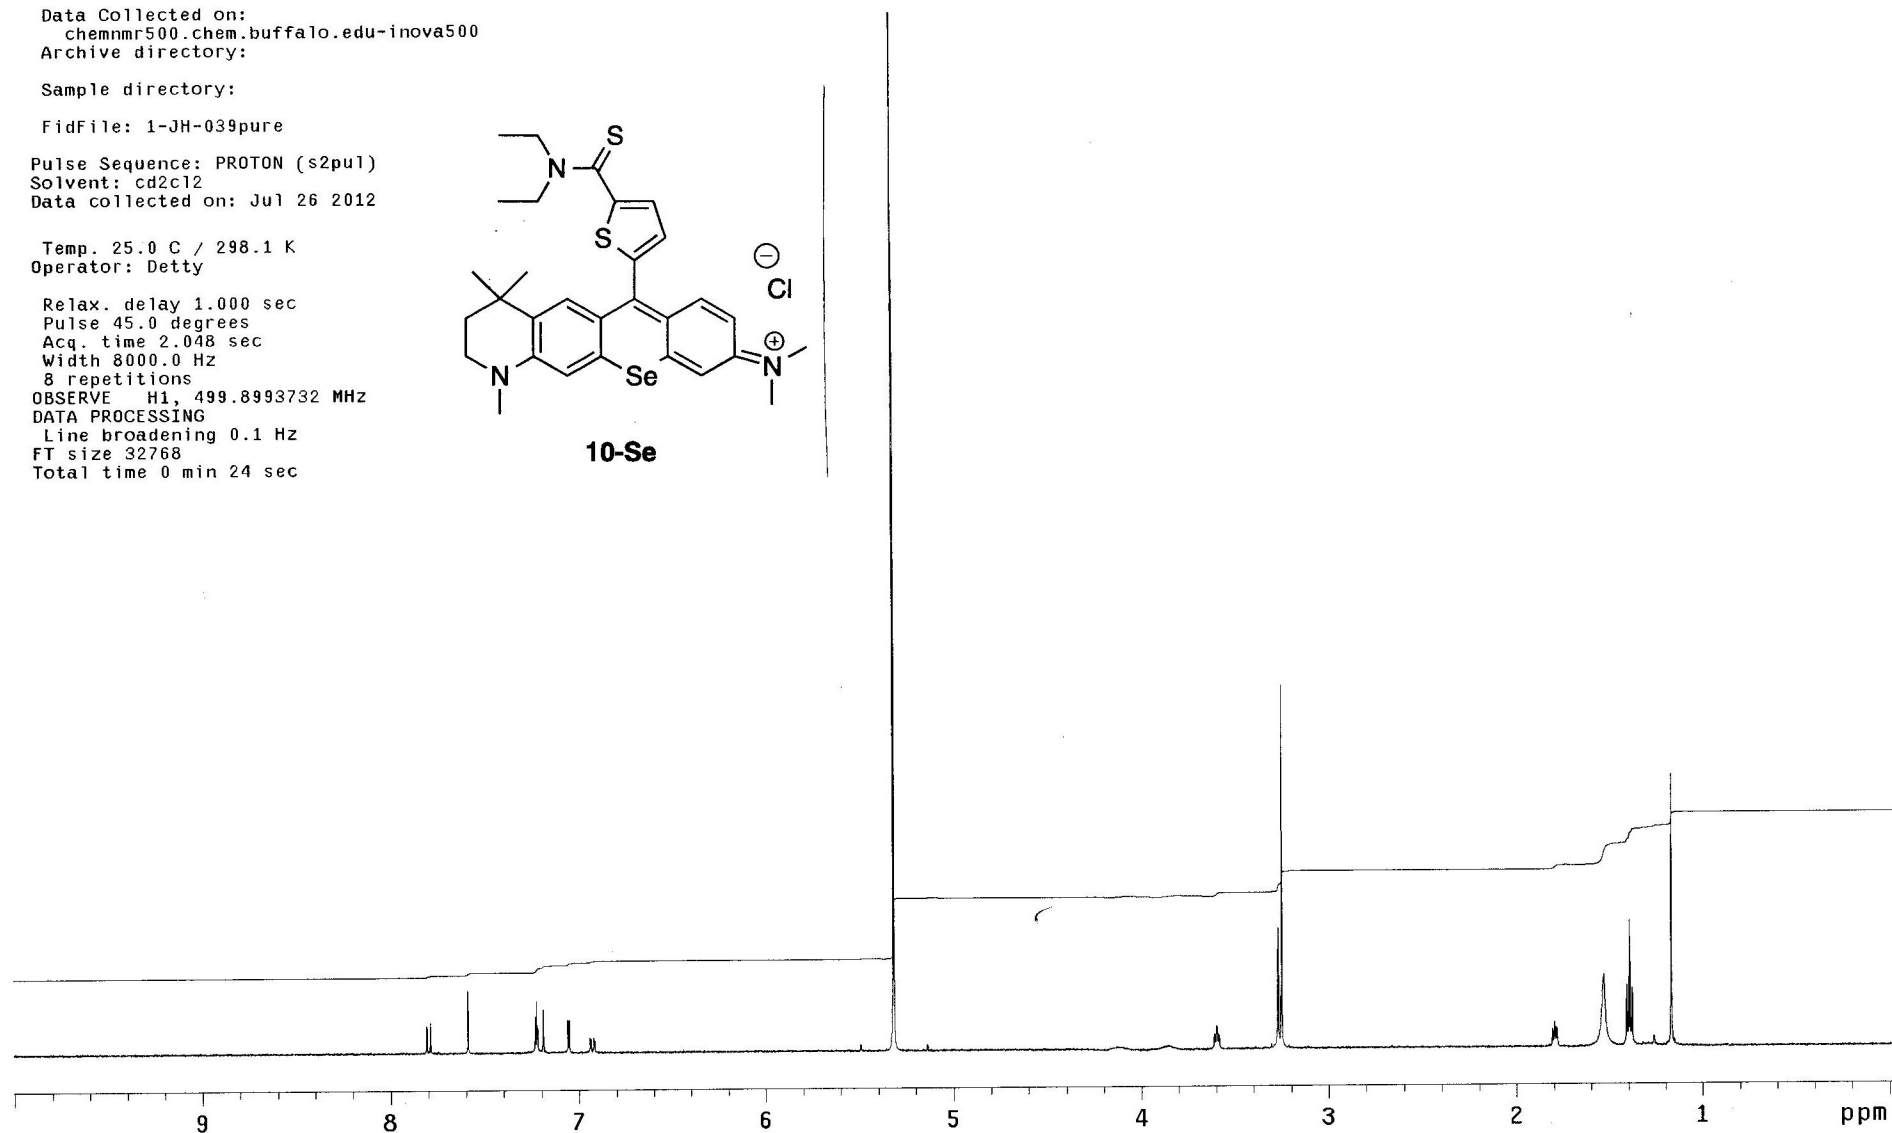

1-JH-039pure

Sample Name:

Data Collected on:  
chemnmr500.chem.buffalo.edu-inova500  
Archive directory:

Sample directory:

Fidfile: 1-JH-039pure

Pulse Sequence: PROTON (s2pu1)  
Solvent: cd2c12  
Data collected on: Jul 26 2012

Temp. 25.0 C / 298.1 K  
Operator: Detty

Relax. delay 1.000 sec  
Pulse 45.0 degrees  
Acq. time 2.048 sec  
Width 8000.0 Hz  
8 repetitions  
OBSERVE H1, 499.8993732 MHz  
DATA PROCESSING  
Line broadening 0.1 Hz  
FT size 32768  
Total time 0 min 24 sec

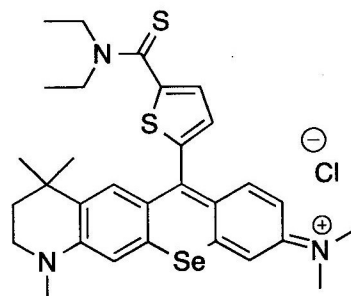

10-Se

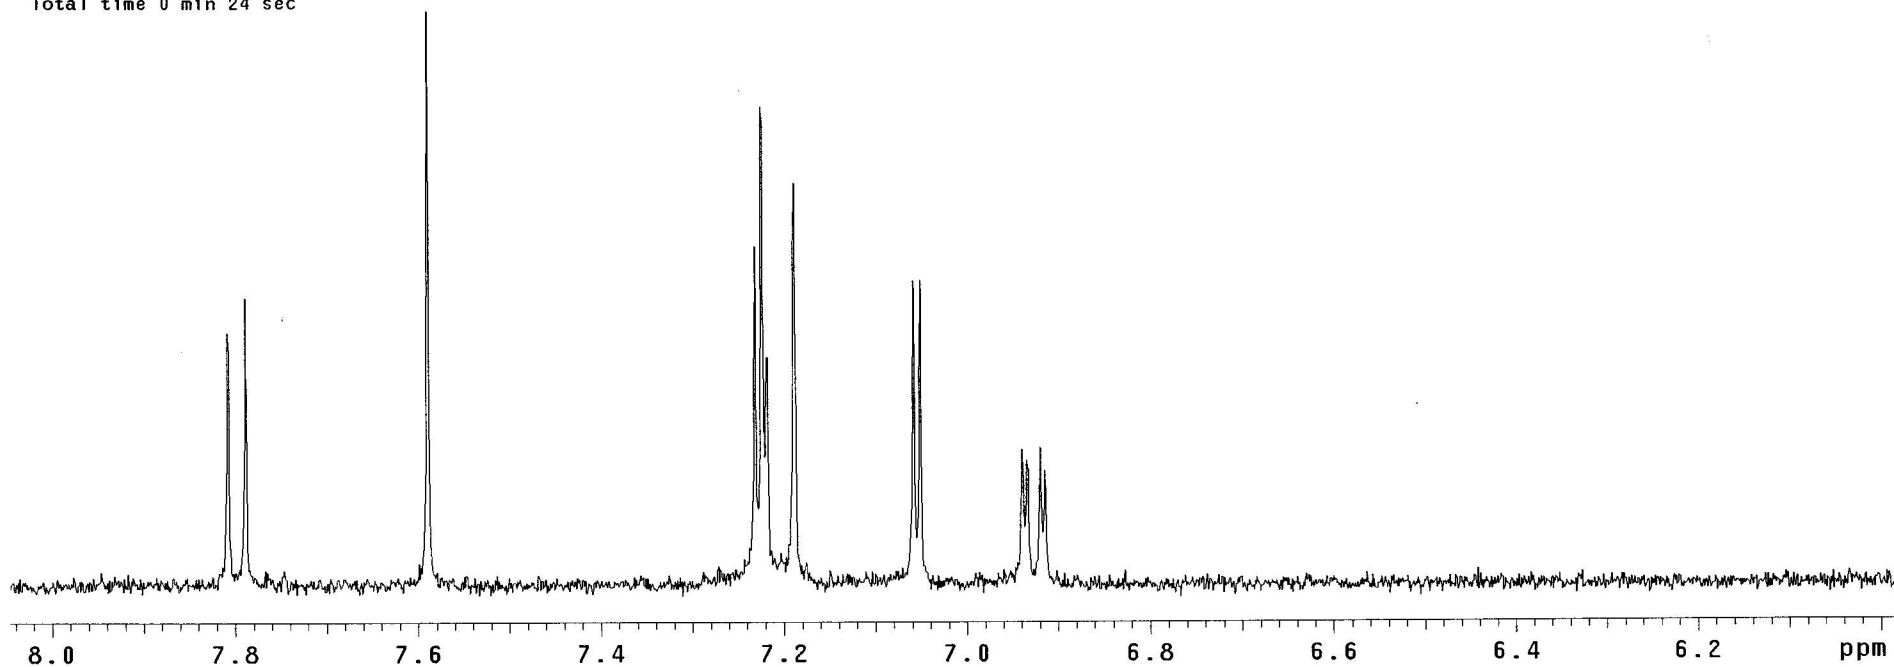

1-JH-039pure

Sample Name:

Data Collected on:  
chemnmr500.chem.buffalo.edu-inova500  
Archive directory:

Sample directory:

FidFile: 1-JH-039pure

Pulse Sequence: PROTON (s2pu1)  
Solvent: cd2c12  
Data collected on: Jul 26 2012

Temp. 25.0 C / 298.1 K  
Operator: Detty

Relax. delay 1.000 sec  
Pulse 45.0 degrees  
Acq. time 2.048 sec  
Width 8000.0 Hz  
8 repetitions  
OBSERVE H1, 499.8993732 MHz  
DATA PROCESSING  
Line broadening 0.1 Hz  
FT size 32768  
Total time 0 min 24 sec

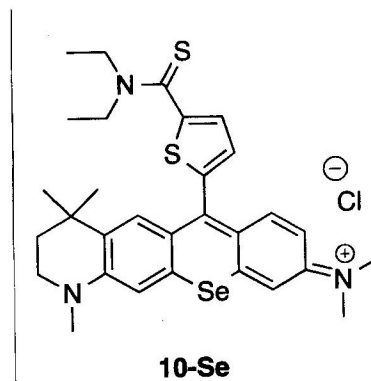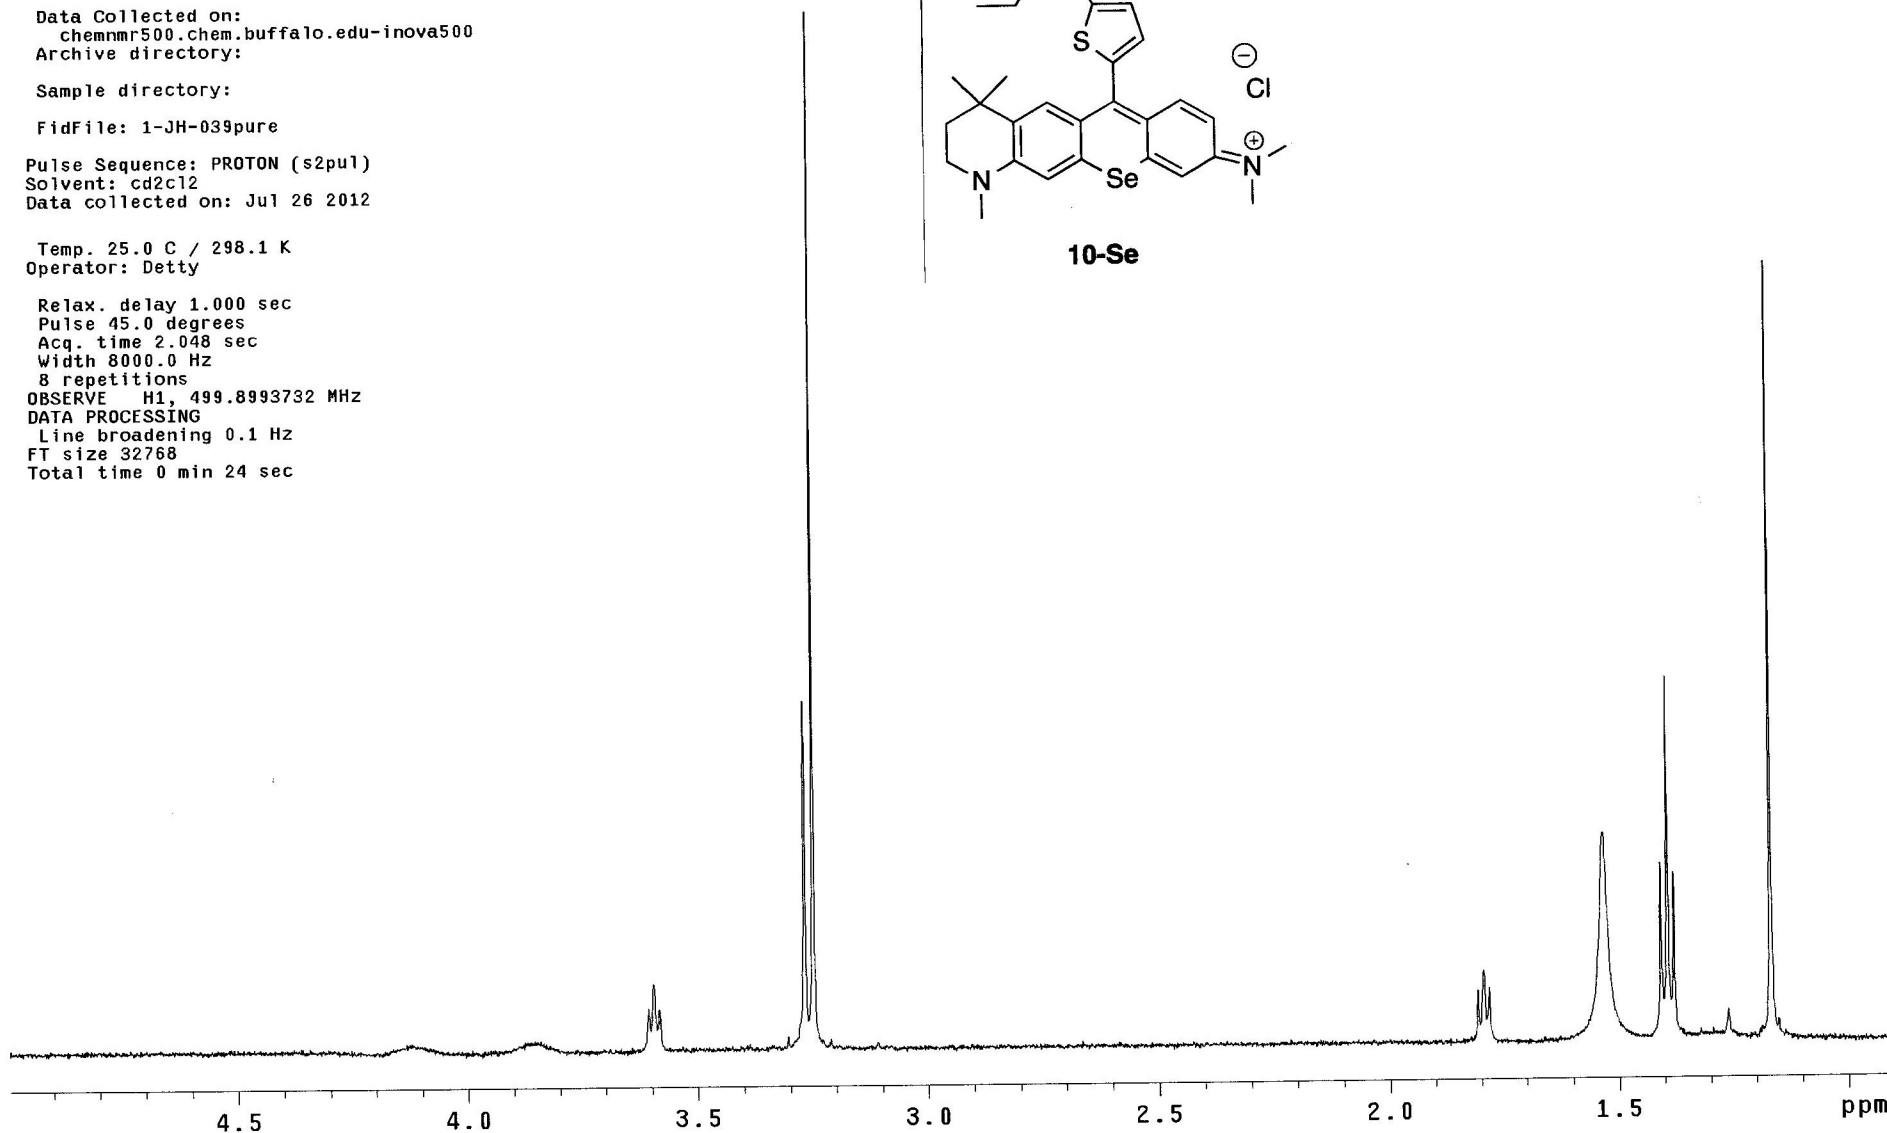

1-JH-039carbon

Sample Name:

Data Collected on:  
chemnmr500.chem.buffalo.edu-inova500  
Archive directory:

Sample directory:

FidFile: 1-JH-039carbon

Pulse Sequence: CARBON (s2pul)  
Solvent: cd2cl2  
Data collected on: Aug 5 2012

Temp. 25.0 C / 298.1 K  
Operator: Detty

Relax. delay 1.000 sec  
Pulse 45.0 degrees  
Acq. time 1.042 sec  
Width 31446.5 Hz  
21760 repetitions  
OBSERVE C13, 125.6997917 MHz  
DECOUPLE H1, 499.9018501 MHz  
Power 36 dB  
continuously on  
WALTZ-16 modulated  
DATA PROCESSING  
Line broadening 0.1 Hz  
FT size 65536  
Total time 569 hr, 43 min

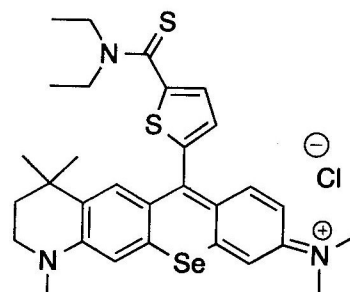

10-Se

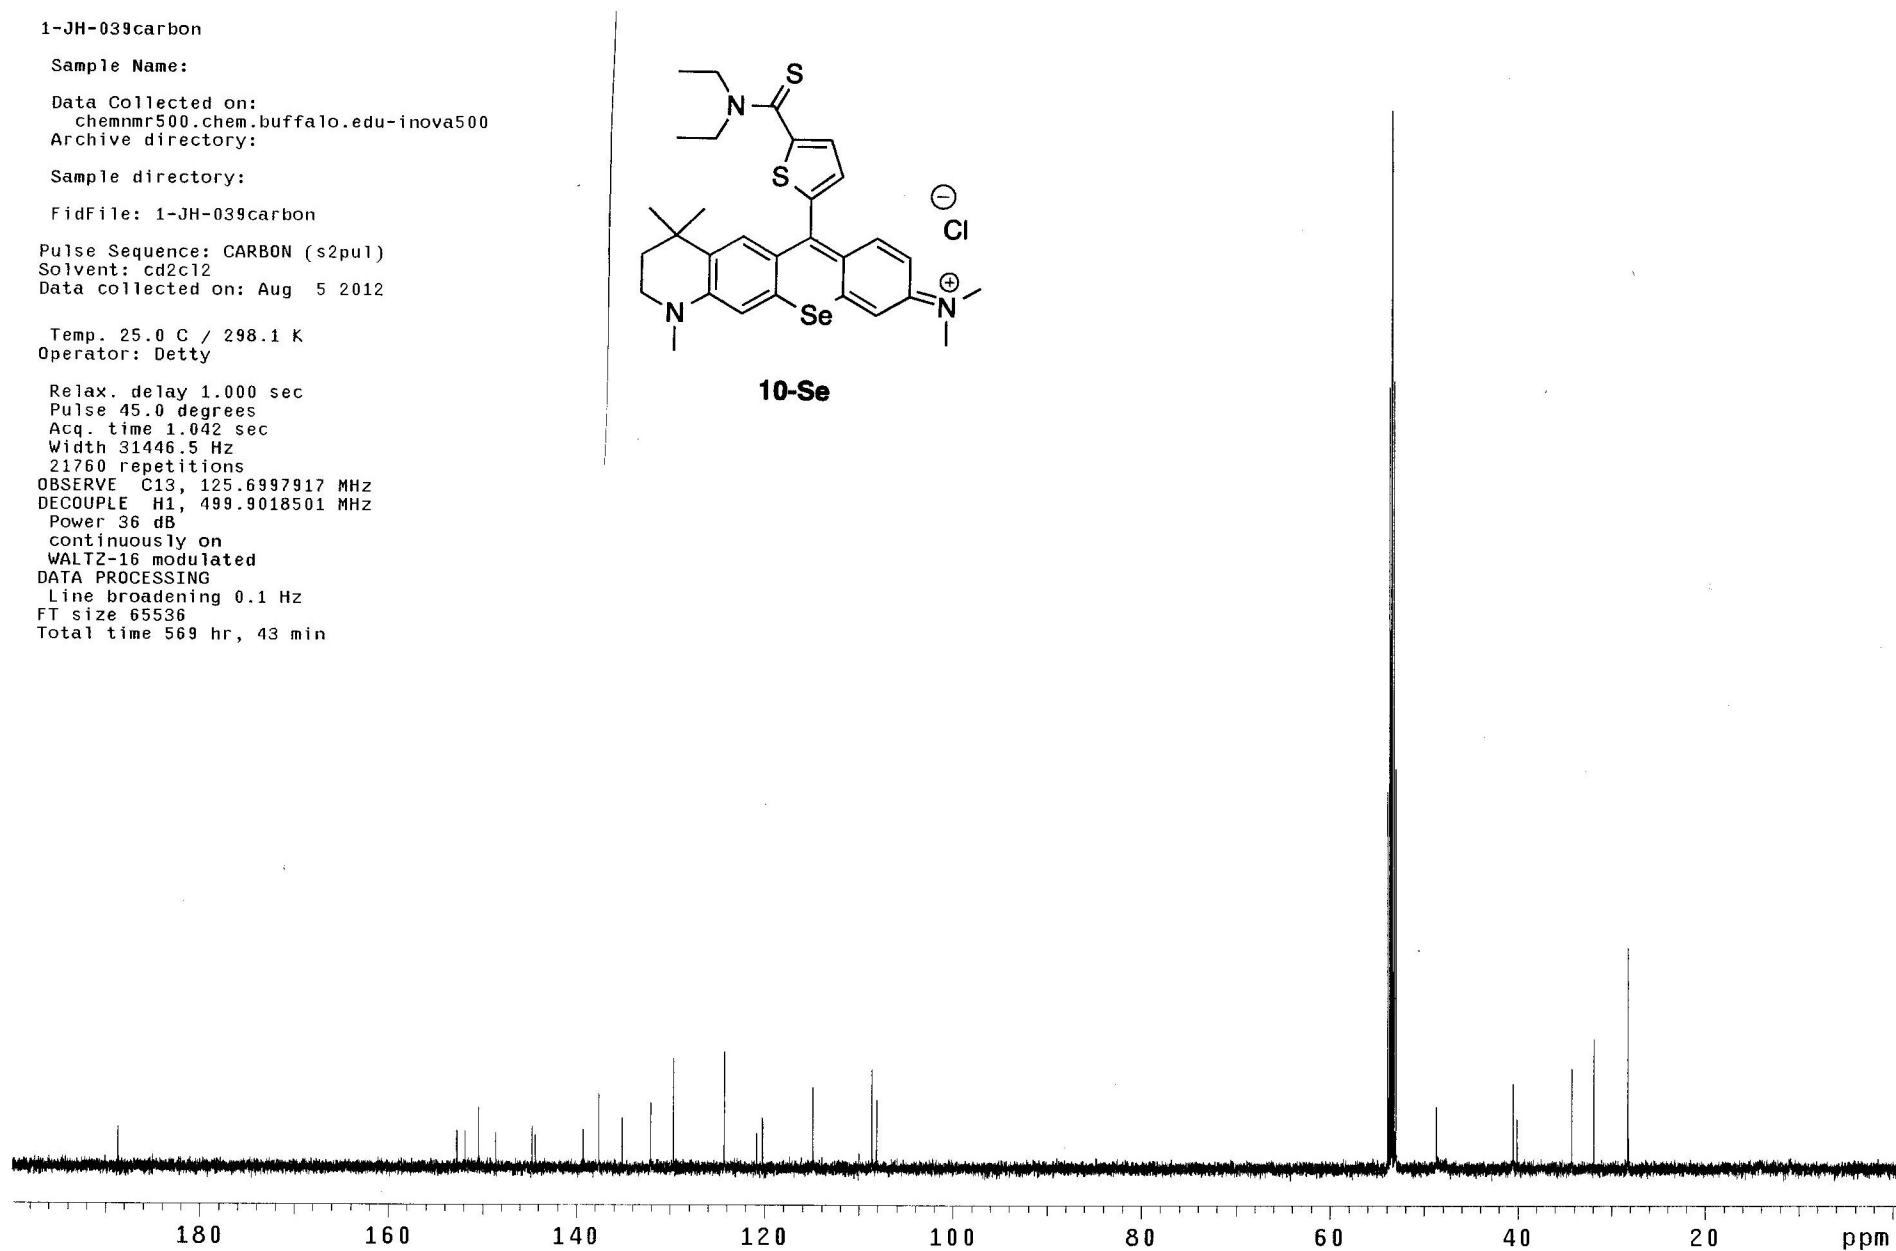

1-JH-039carbon

Sample Name:

Data Collected on:  
chemnmr500.chem.buffalo.edu-inova500  
Archive directory:

Sample directory:

FidFile: 1-JH-039carbon

Pulse Sequence: CARBON (s2pu1)  
Solvent: cd2c12  
Data collected on: Aug 5 2012

Temp. 25.0 C / 298.1 K  
Operator: Detty

Relax. delay 1.000 sec  
Pulse 45.0 degrees  
Acq. time 1.042 sec  
Width 31446.5 Hz  
21760 repetitions  
OBSERVE C13, 125.6997917 MHz  
DECOUPLE H1, 499.9018501 MHz  
Power 36 dB  
continuously on  
WALTZ-16 modulated  
DATA PROCESSING  
Line broadening 0.1 Hz  
FT size 65536  
Total time 569 hr.,43 min

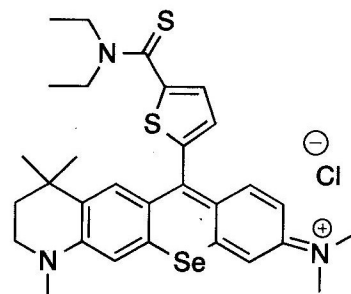

10-Se

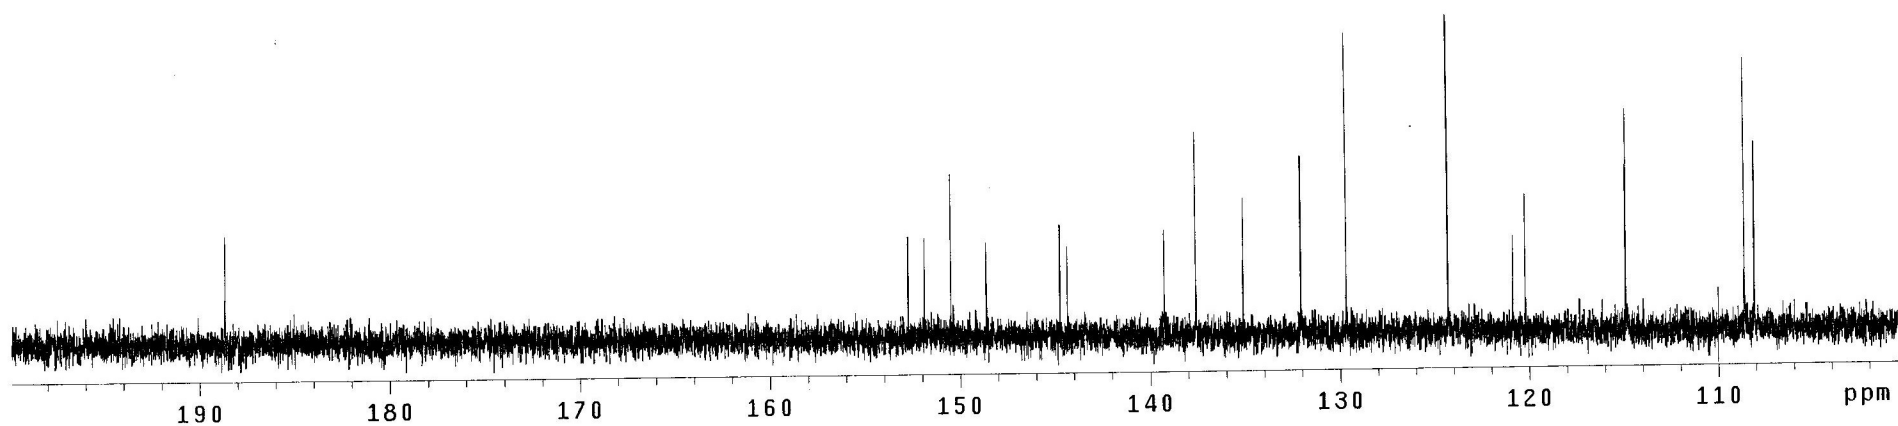

1-JH-041spot2

Sample Name:

Data Collected on:  
chemnmr500.chem.buffalo.edu-inova500  
Archive directory:

Sample directory:

FidFile: 1-JH-041spot2

Pulse Sequence: PROTON (s2pu1)  
Solvent: cd2c12  
Data collected on: Aug 6 2012

Temp. 25.0 C / 298.1 K  
Operator: Detty

Relax. delay 1.000 sec  
Pulse 45.0 degrees  
Acq. time 2.048 sec  
Width 8000.0 Hz  
8 repetitions  
OBSERVE H1, 499.8993712 MHz  
DATA PROCESSING  
Line broadening 0.1 Hz  
FT size 32768  
Total time 0 min 24 sec

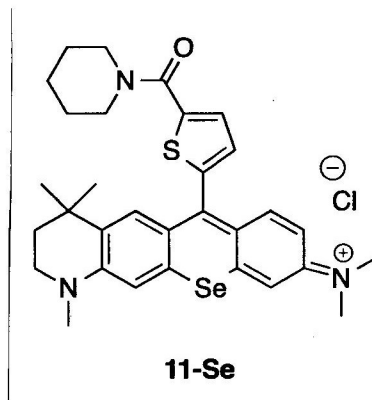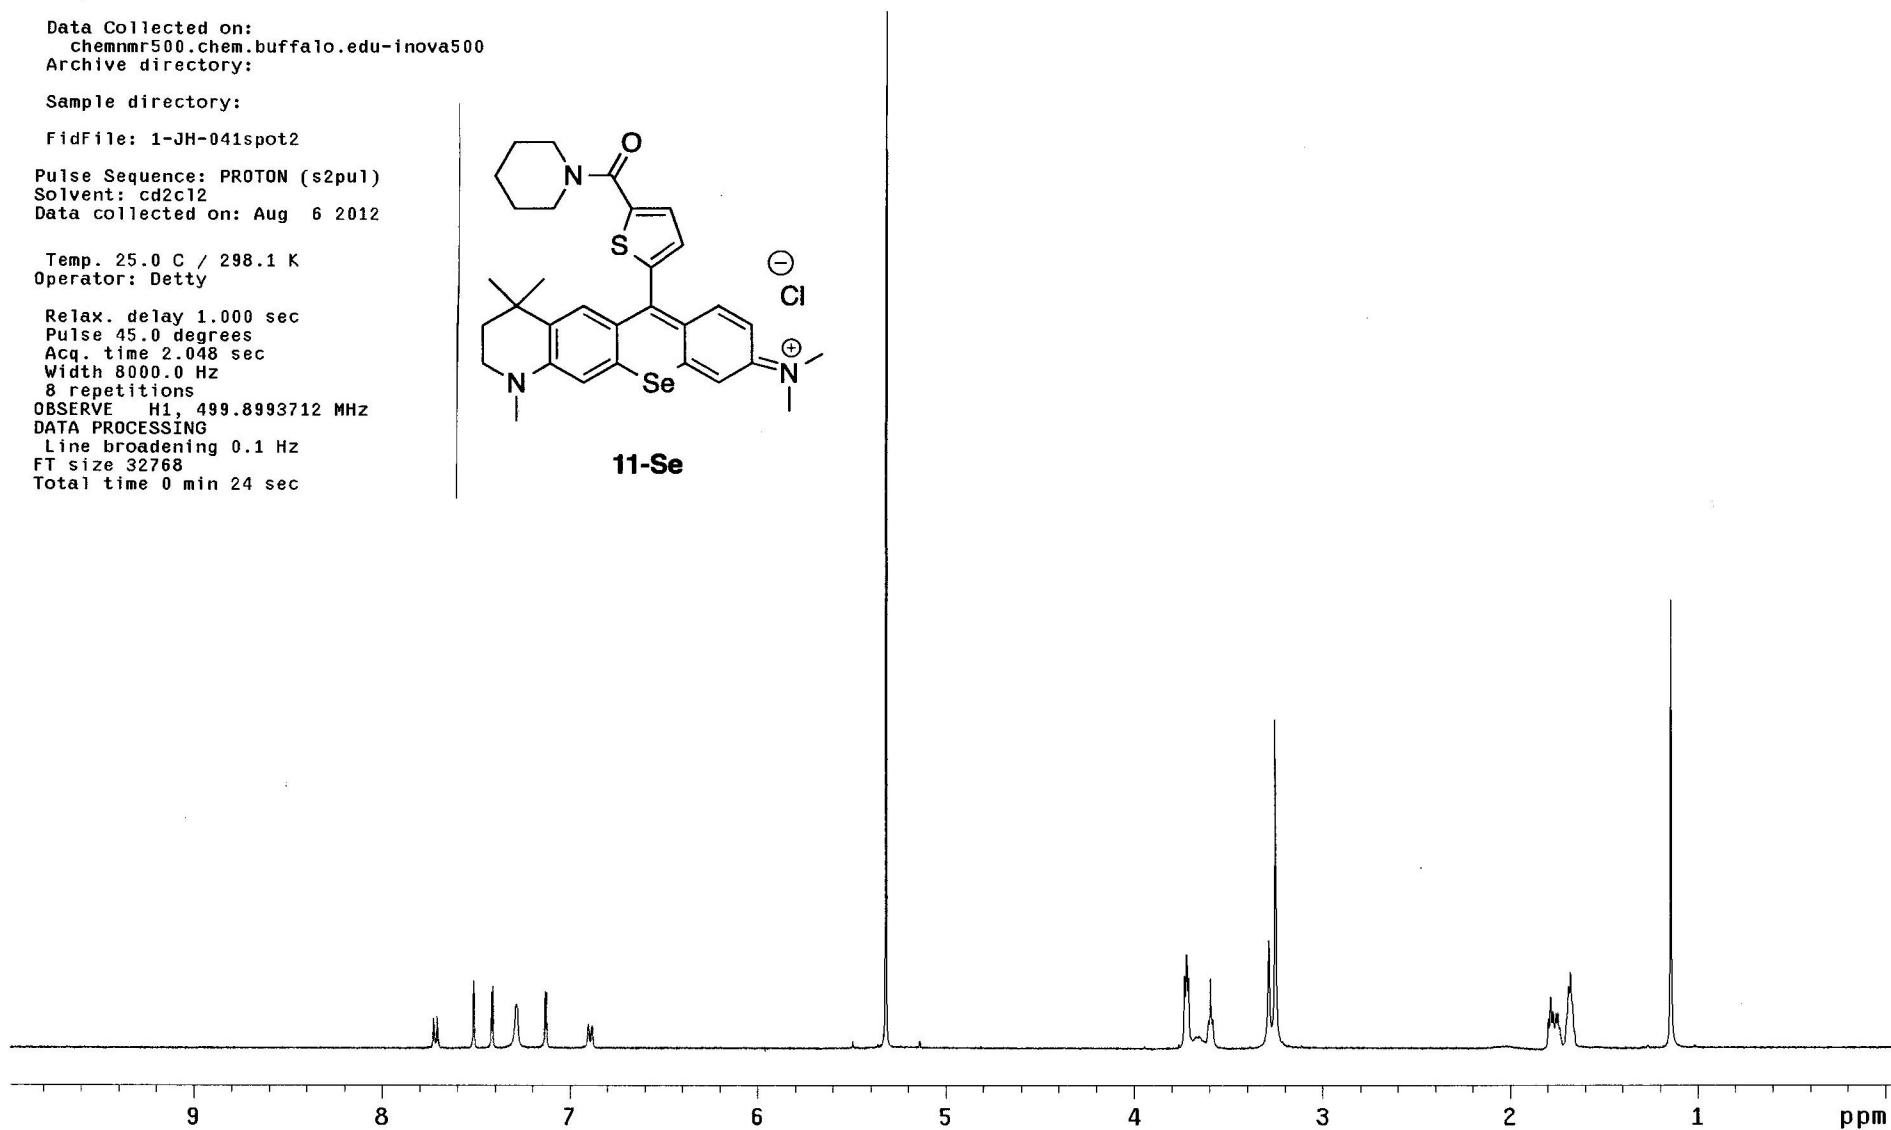



1-JH-041spot2

Sample Name:

Data Collected on:  
chemnmr500.chem.buffalo.edu-inova500  
Archive directory:

Sample directory:

FidFile: 1-JH-041spot2

Pulse Sequence: PROTON (s2pu1)  
Solvent: cd2c12  
Data collected on: Aug 6 2012

Temp. 25.0 C / 298.1 K  
Operator: Detty

Relax. delay 1.000 sec  
Pulse 45.0 degrees  
Acq. time 2.048 sec  
Width 8000.0 Hz  
8 repetitions  
OBSERVE H1, 499.8993712 MHz  
DATA PROCESSING  
Line broadening 0.1 Hz  
FT size 32768  
Total time 0 min 24 sec

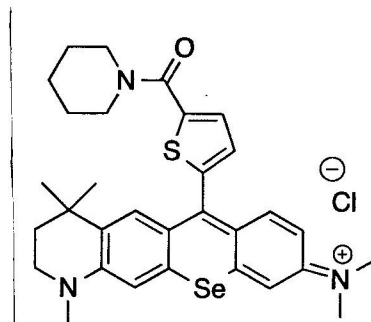

11-Se

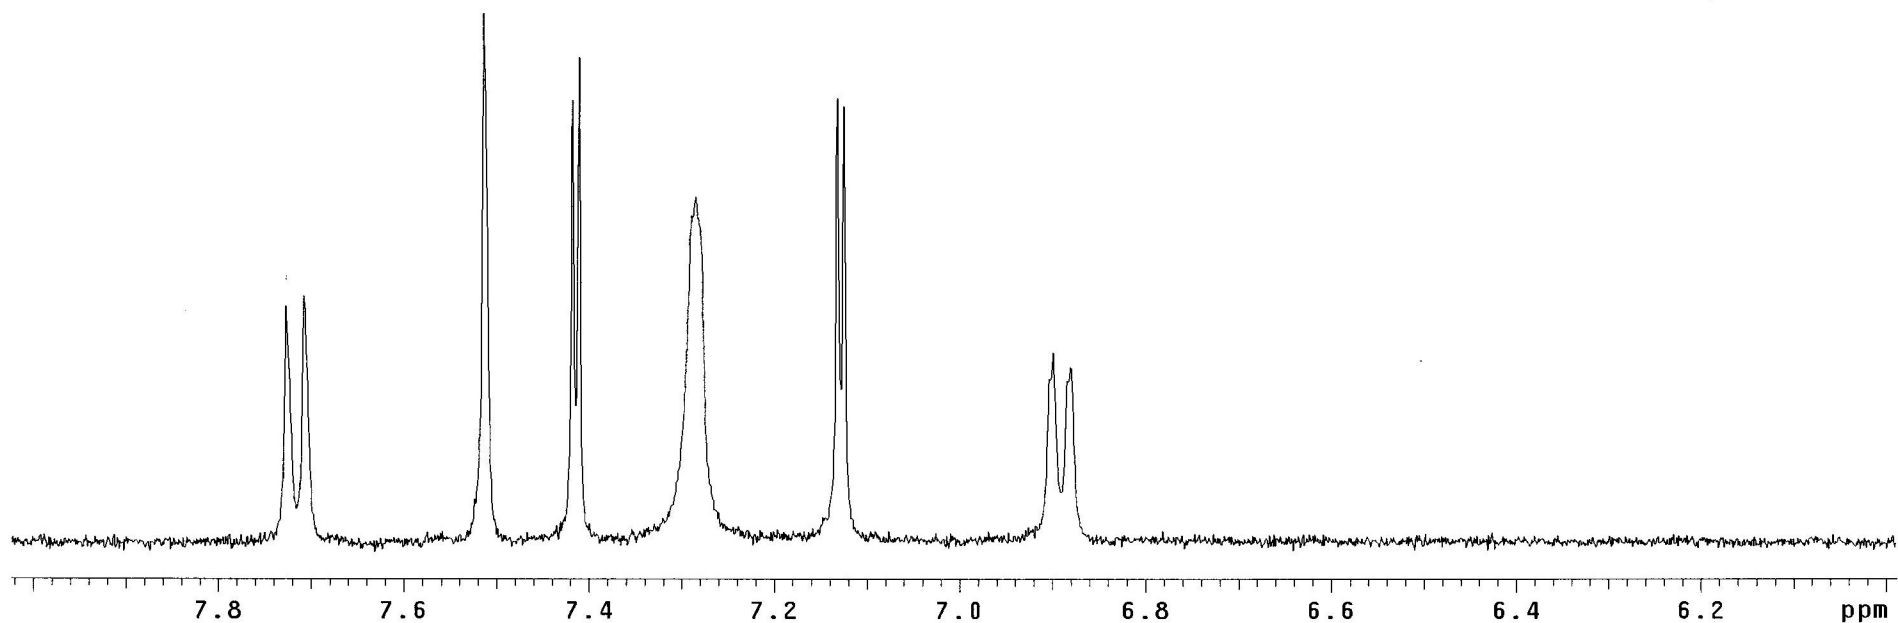

1-JH-041spot2

Sample Name:

Data Collected on:  
chemnmr500.chem.buffalo.edu-inova500  
Archive directory:

Sample directory:

FidFile: 1-JH-041spot2

Pulse Sequence: PROTON (s2pu1)  
Solvent: cd2c12  
Data collected on: Aug 6 2012

Temp. 25.0 C / 298.1 K  
Operator: Detty

Relax. delay 1.000 sec  
Pulse 45.0 degrees  
Acq. time 2.048 sec  
Width 8000.0 Hz  
8 repetitions  
OBSERVE H1, 499.8993712 MHz  
DATA PROCESSING  
Line broadening 0.1 Hz  
FT size 32768  
Total time 0 min 24 sec

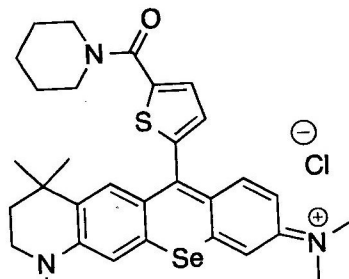

11-Se

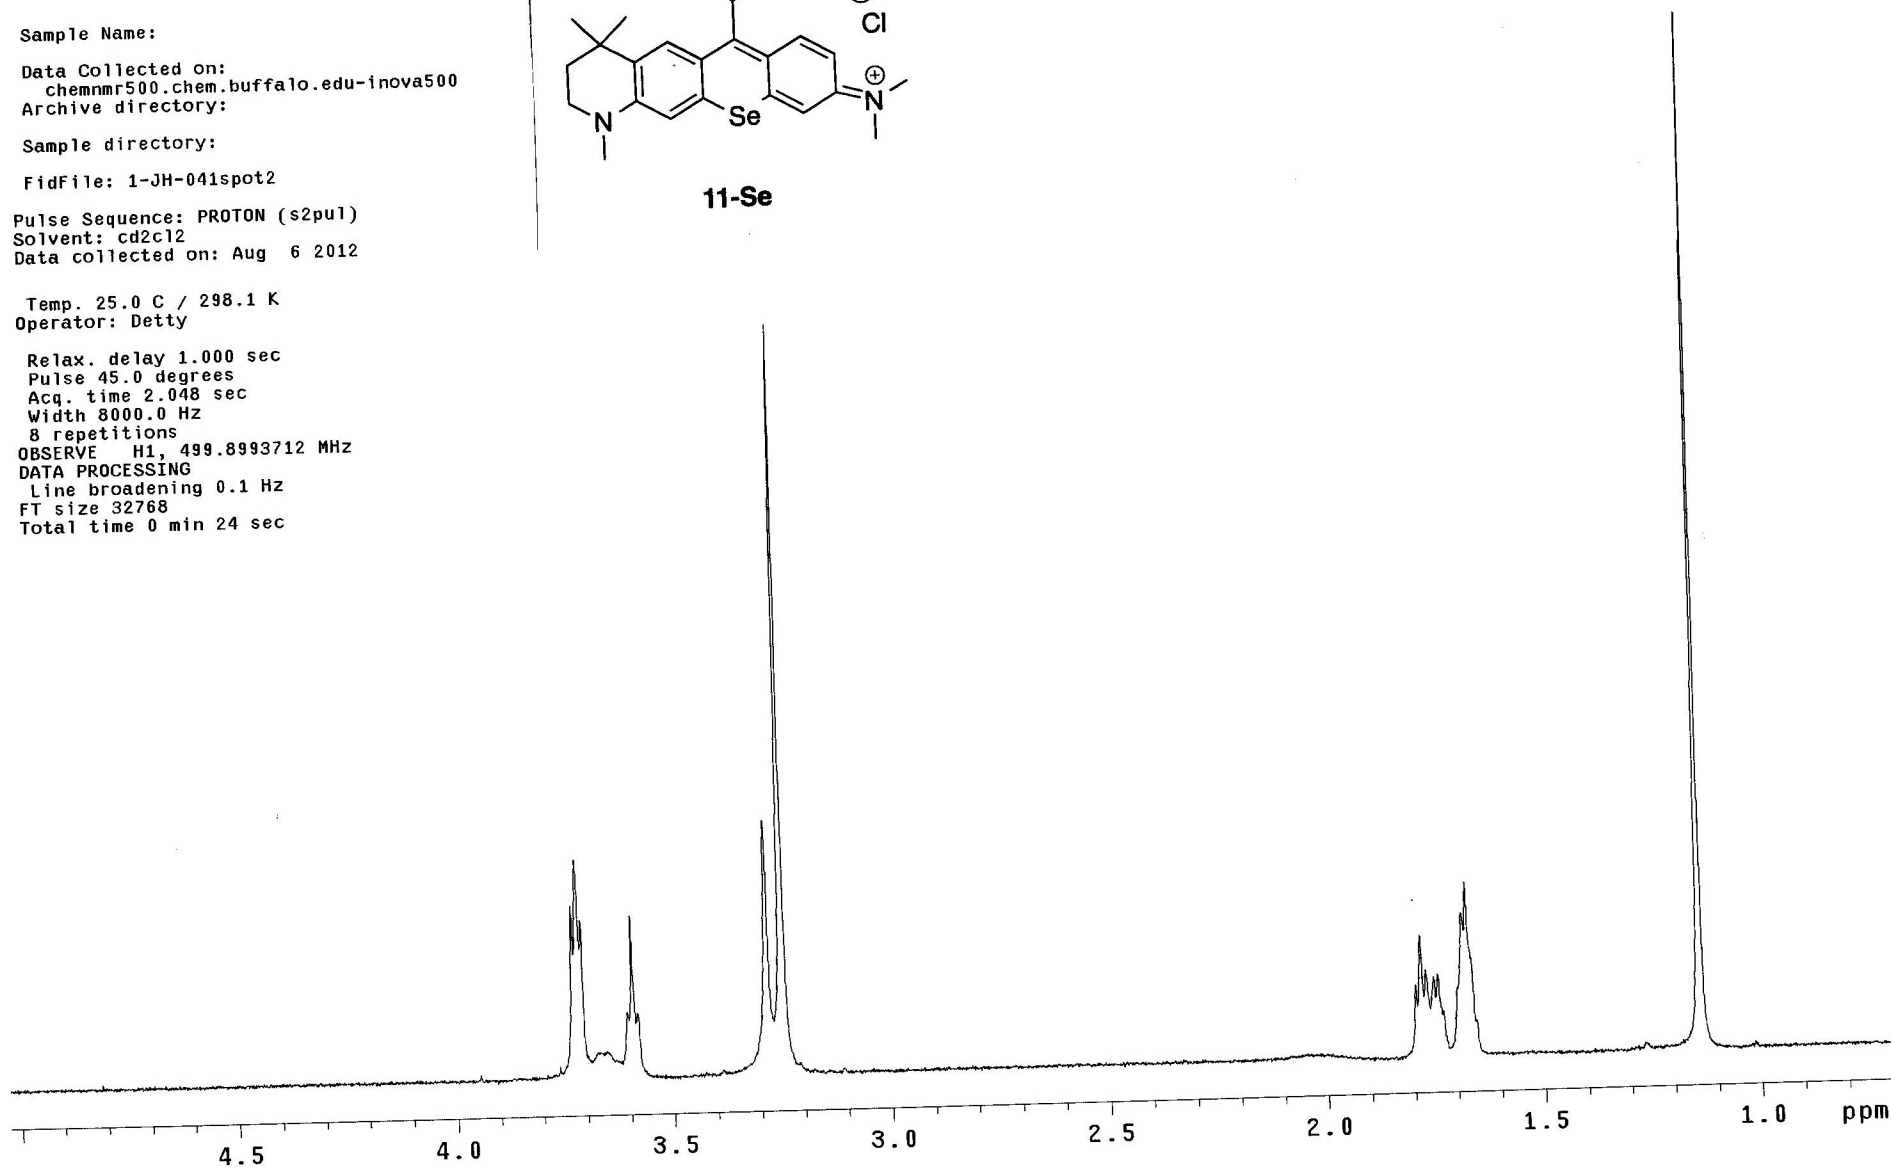

I-JH-041C1-saltcarbon

Sample Name:

Data Collected on:  
roesy.chem.buffalo.edu-mercury300  
Archive directory:

Sample directory:

FidFile: I-JH-041C1-saltcarbon

Pulse Sequence: CARBON (s2pu1)  
Solvent: cdc13  
Data collected on: Jul 30 2013

Temp. 25.0 C / 298.1 K  
Operator: Detty

Relax. delay 1.000 sec  
Pulse 45.0 degrees  
Acq. time 0.868 sec  
Width 18867.9 Hz  
2176 repetitions  
OBSERVE C13, 75.4536780 MHz  
DECOUPLE H1, 300.0754430 MHz  
Power 38 dB  
continuously on  
WALTZ-16 modulated  
DATA PROCESSING  
Line broadening 0.5 Hz  
FT size 32768  
Total time 536 hr, 56 min

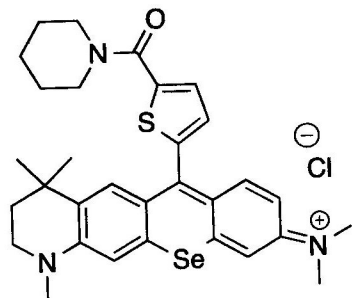

11-Se

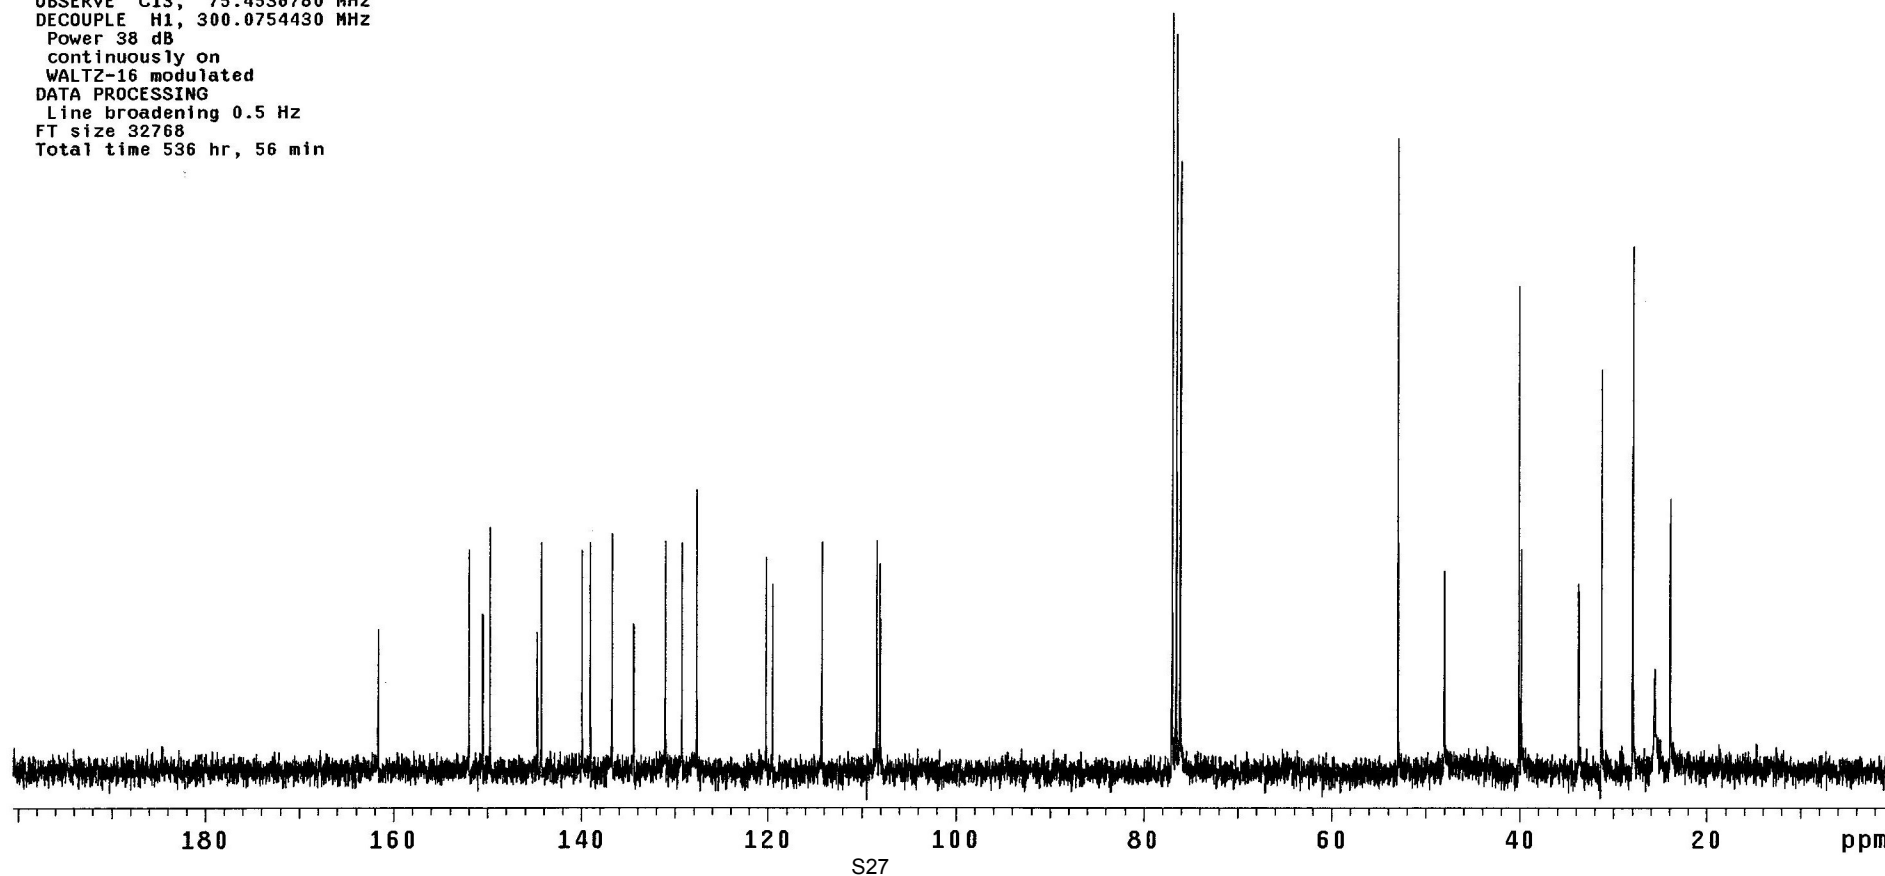

I-JH-041C1-saltcarbon

Sample Name:

Data Collected on:  
roesy.chem.buffalo.edu-mercury300  
Archive directory:

Sample directory:

FidFile: I-JH-041C1-saltcarbon

Pulse Sequence: CARBON (s2pu1)  
Solvent: cdc13  
Data collected on: Jul 30 2013

Temp. 25.0 C / 298.1 K  
Operator: Detty

Relax. delay 1.000 sec  
Pulse 45.0 degrees  
Acq. time 0.868 sec  
Width 18867.9 Hz  
2176 repetitions  
OBSERVE C13, 75.4536780 MHz  
DECOUPLE H1, 300.0754430 MHz  
Power 38 dB  
continuously on  
WALTZ-16 modulated  
DATA PROCESSING  
Line broadening 0.5 Hz  
FT size 32768  
Total time 536 hr, 56 min

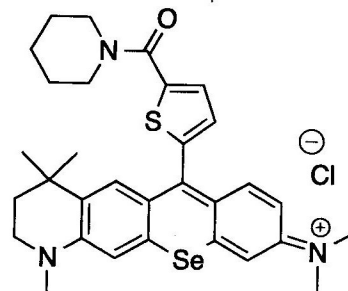

11-Se

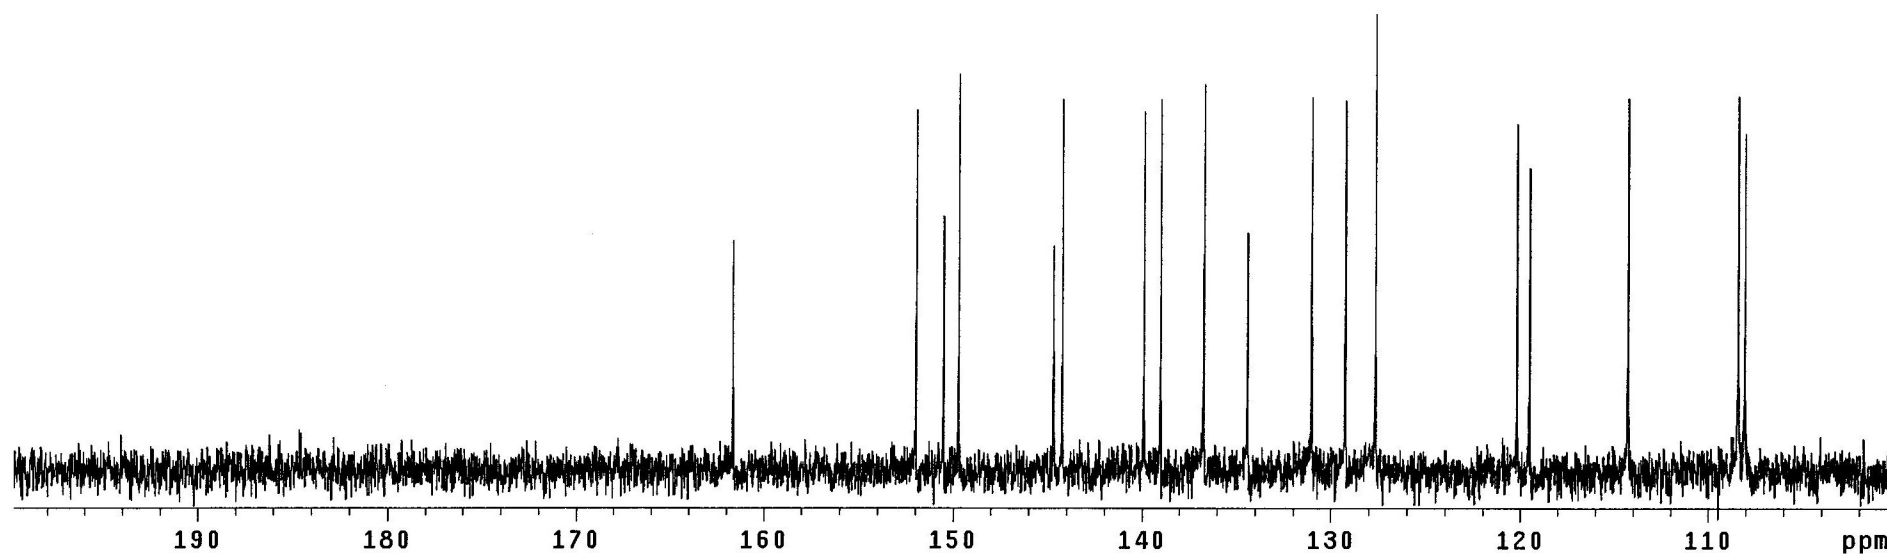

1-JH-040

Sample Name:

Data Collected on:  
chemnmr500.chem.buffalo.edu-inova500  
Archive directory:

Sample directory:

FidFile: 1-JH-040

Pulse Sequence: PROTON (s2pu1)  
Solvent: cd2c12  
Data collected on: Jul 30 2012

Temp. 25.0 C / 298.1 K  
Operator: Detty

Relax. delay 1.000 sec  
Pulse 45.0 degrees  
Acq. time 2.048 sec  
Width 8000.0 Hz  
8 repetitions  
OBSERVE H1, 499.8993722 MHz  
DATA PROCESSING  
Line broadening 0.1 Hz  
FT size 32768  
Total time 0 min 24 sec

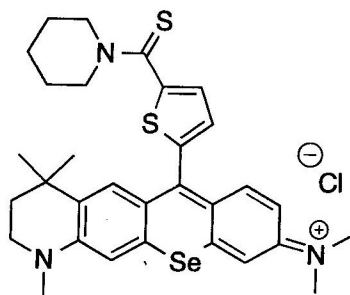

12-Se

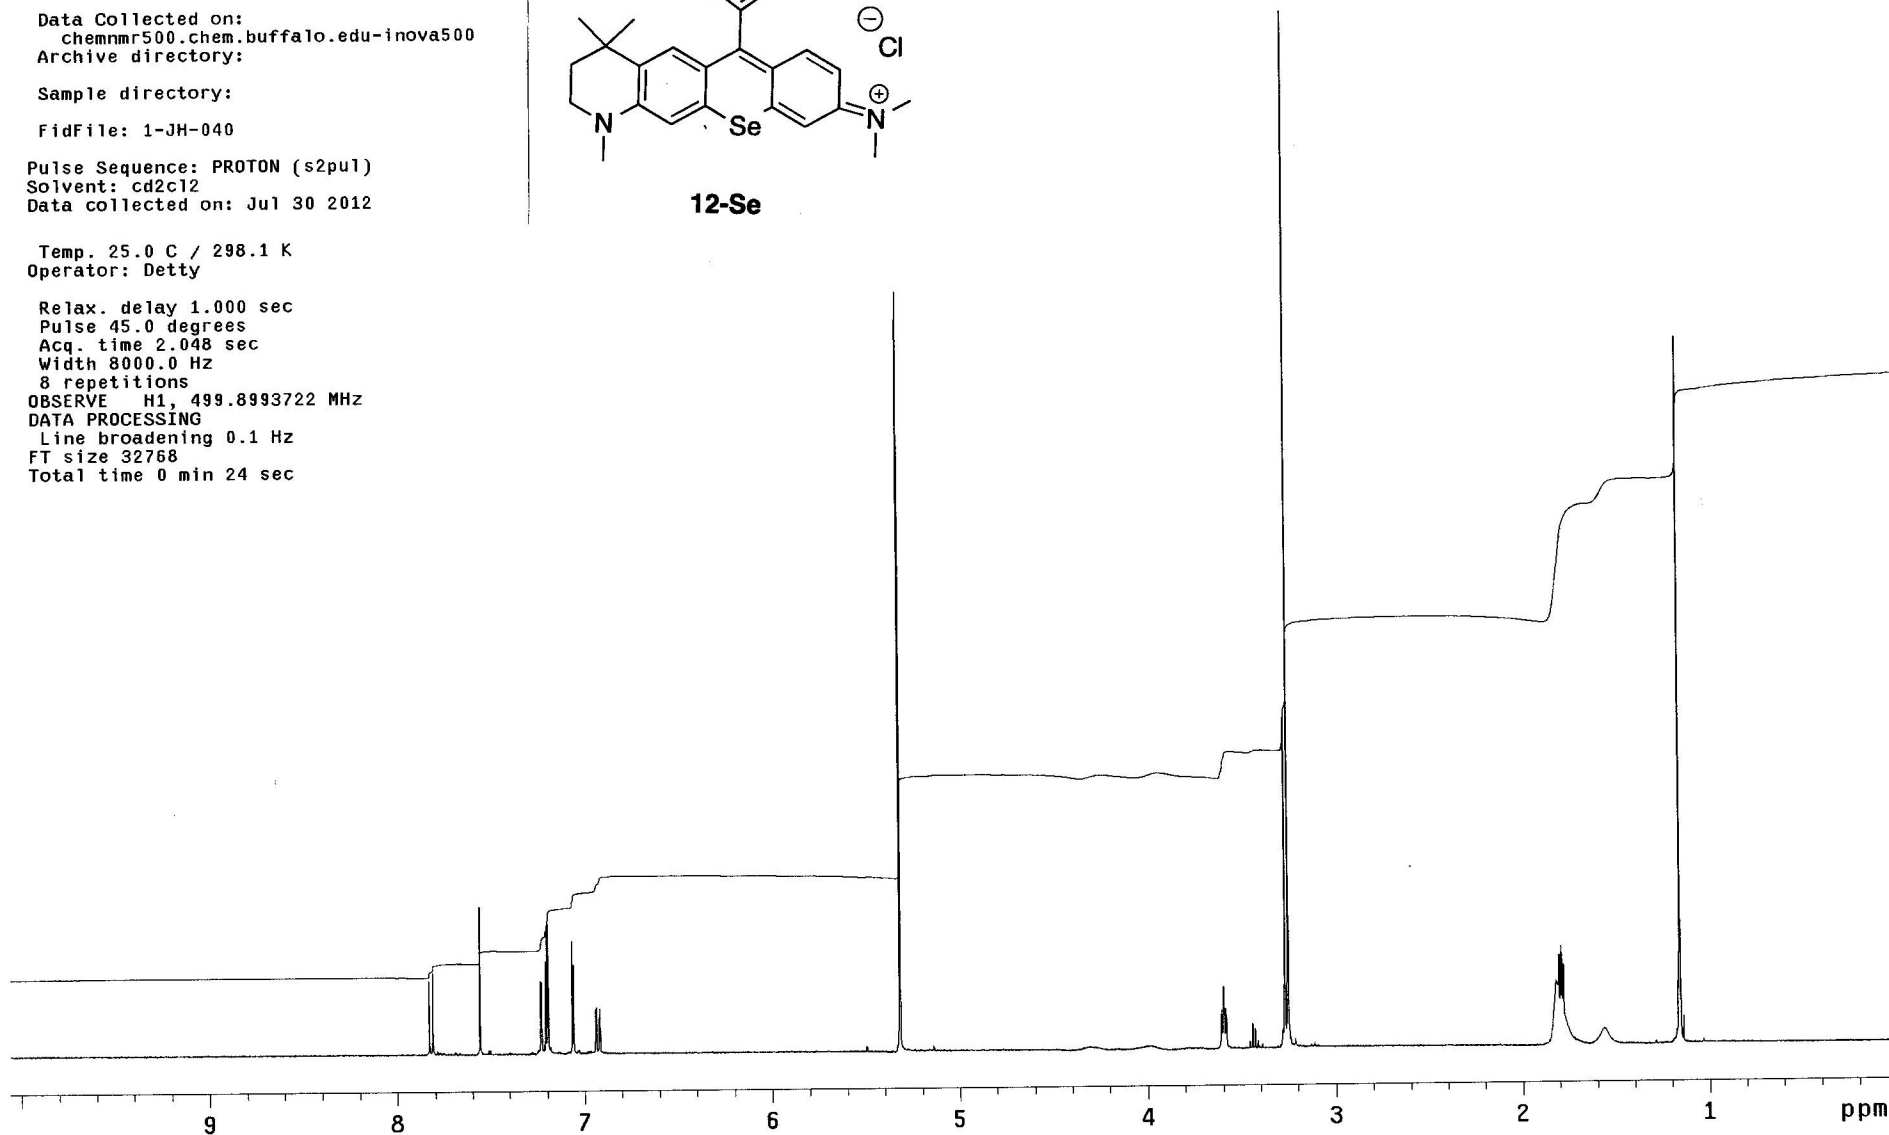

1-JH-040

Sample Name:

Data Collected on:  
chemnmr500.chem.buffalo.edu-inova500  
Archive directory:

Sample directory:

FidFile: 1-JH-040

Pulse Sequence: PROTON (s2pu1)  
Solvent: cd2c12  
Data collected on: Jul 30 2012

Temp. 25.0 C / 298.1 K  
Operator: Detty

Relax. delay 1.000 sec  
Pulse 45.0 degrees  
Acq. time 2.048 sec  
Width 8000.0 Hz  
8 repetitions  
OBSERVE H1, 499.8993722 MHz  
DATA PROCESSING  
Line broadening 0.1 Hz  
FT size 32768  
Total time 0 min 24 sec

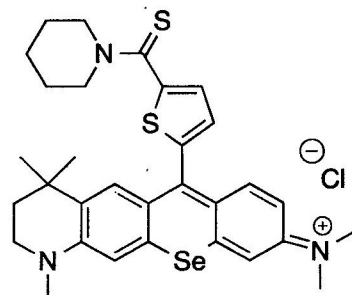

12-Se

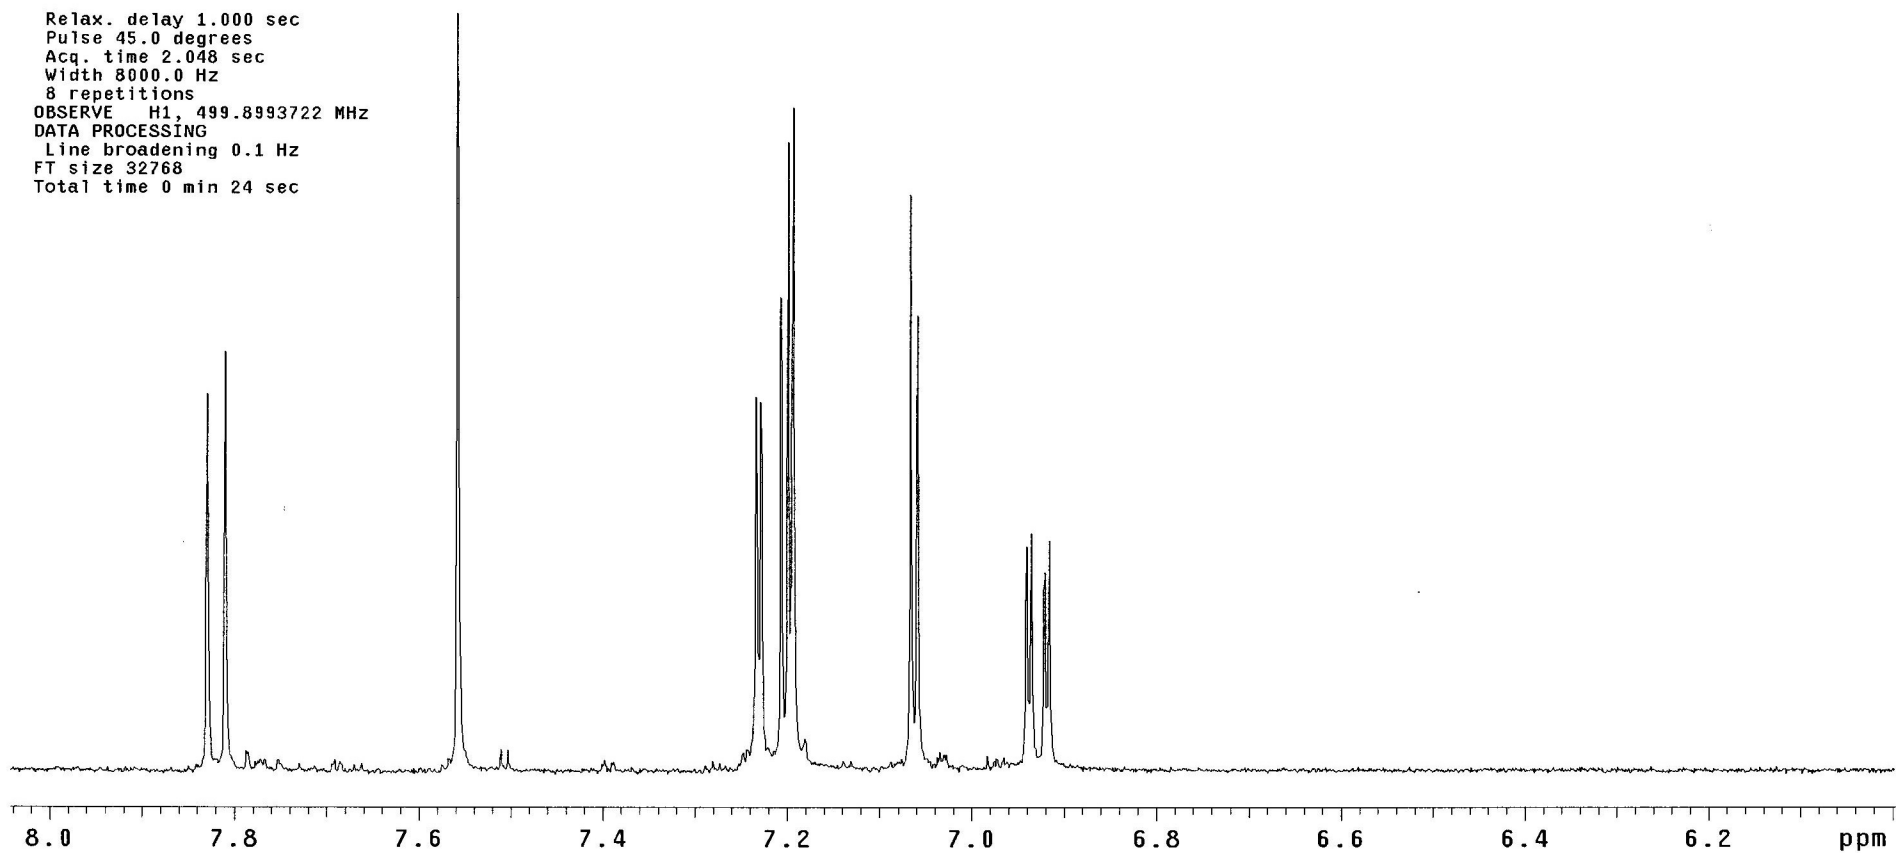

1-JH-040

Sample Name:

Data Collected on:  
chemnmr500.chem.buffalo.edu-inova500  
Archive directory:

Sample directory:

FidFile: 1-JH-040

Pulse Sequence: PROTON (s2pu1)  
Solvent: cd2c12  
Data collected on: Jul 30 2012

Temp. 25.0 C / 298.1 K  
Operator: Detty

Relax. delay 1.000 sec  
Pulse 45.0 degrees  
Acq. time 2.048 sec  
Width 8000.0 Hz  
8 repetitions  
OBSERVE H1, 499.8993722 MHz  
DATA PROCESSING  
Line broadening 0.1 Hz  
FT size 32768  
Total time 0 min 24 sec

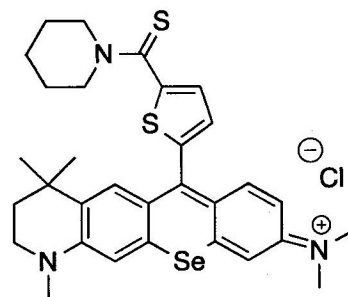

12-Se

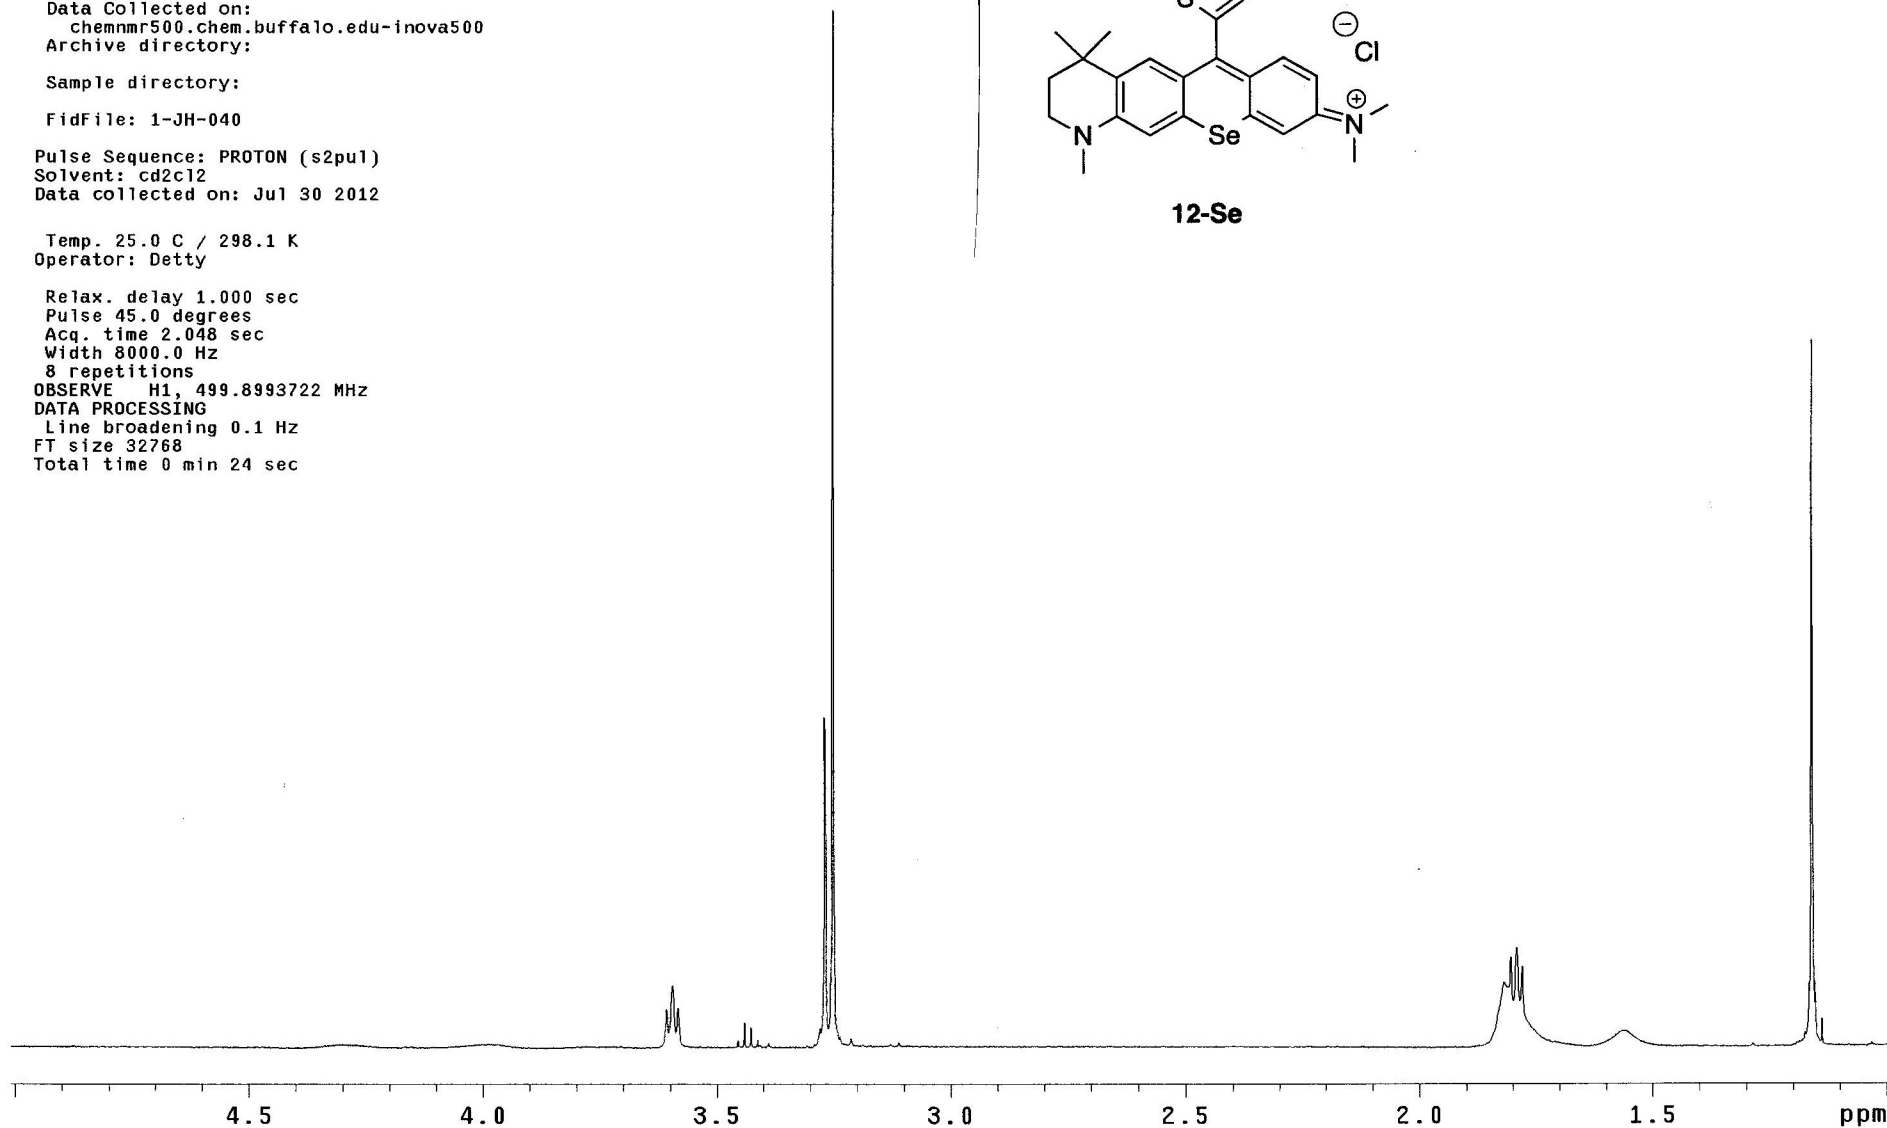

I-JH-040-carbon

Sample Name:

Data Collected on:  
nmr300.chem.buffalo.edu-mercury300  
Archive directory:

Sample directory:

FidFile: CARBON

Pulse Sequence: CARBON (s2pu1)  
Solvent: cd2c12  
Data collected on: May 7 2014

Temp. 23.7 C / 296.9 K  
Operator: Detty

Relax. delay 1.000 sec  
Pulse 45.0 degrees  
Acq. time 0.868 sec  
Width 18867.9 Hz  
24704 repetitions  
OBSERVE C13, 75.4537551 MHz  
DECOUPLE H1, 300.0760191 MHz  
Power 38 dB  
continuously on  
WALTZ-16 modulated  
DATA PROCESSING  
Line broadening 0.5 Hz  
FT size 32768  
Total time 536 hr, 56 min

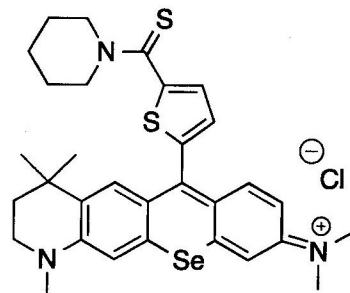

12-Se

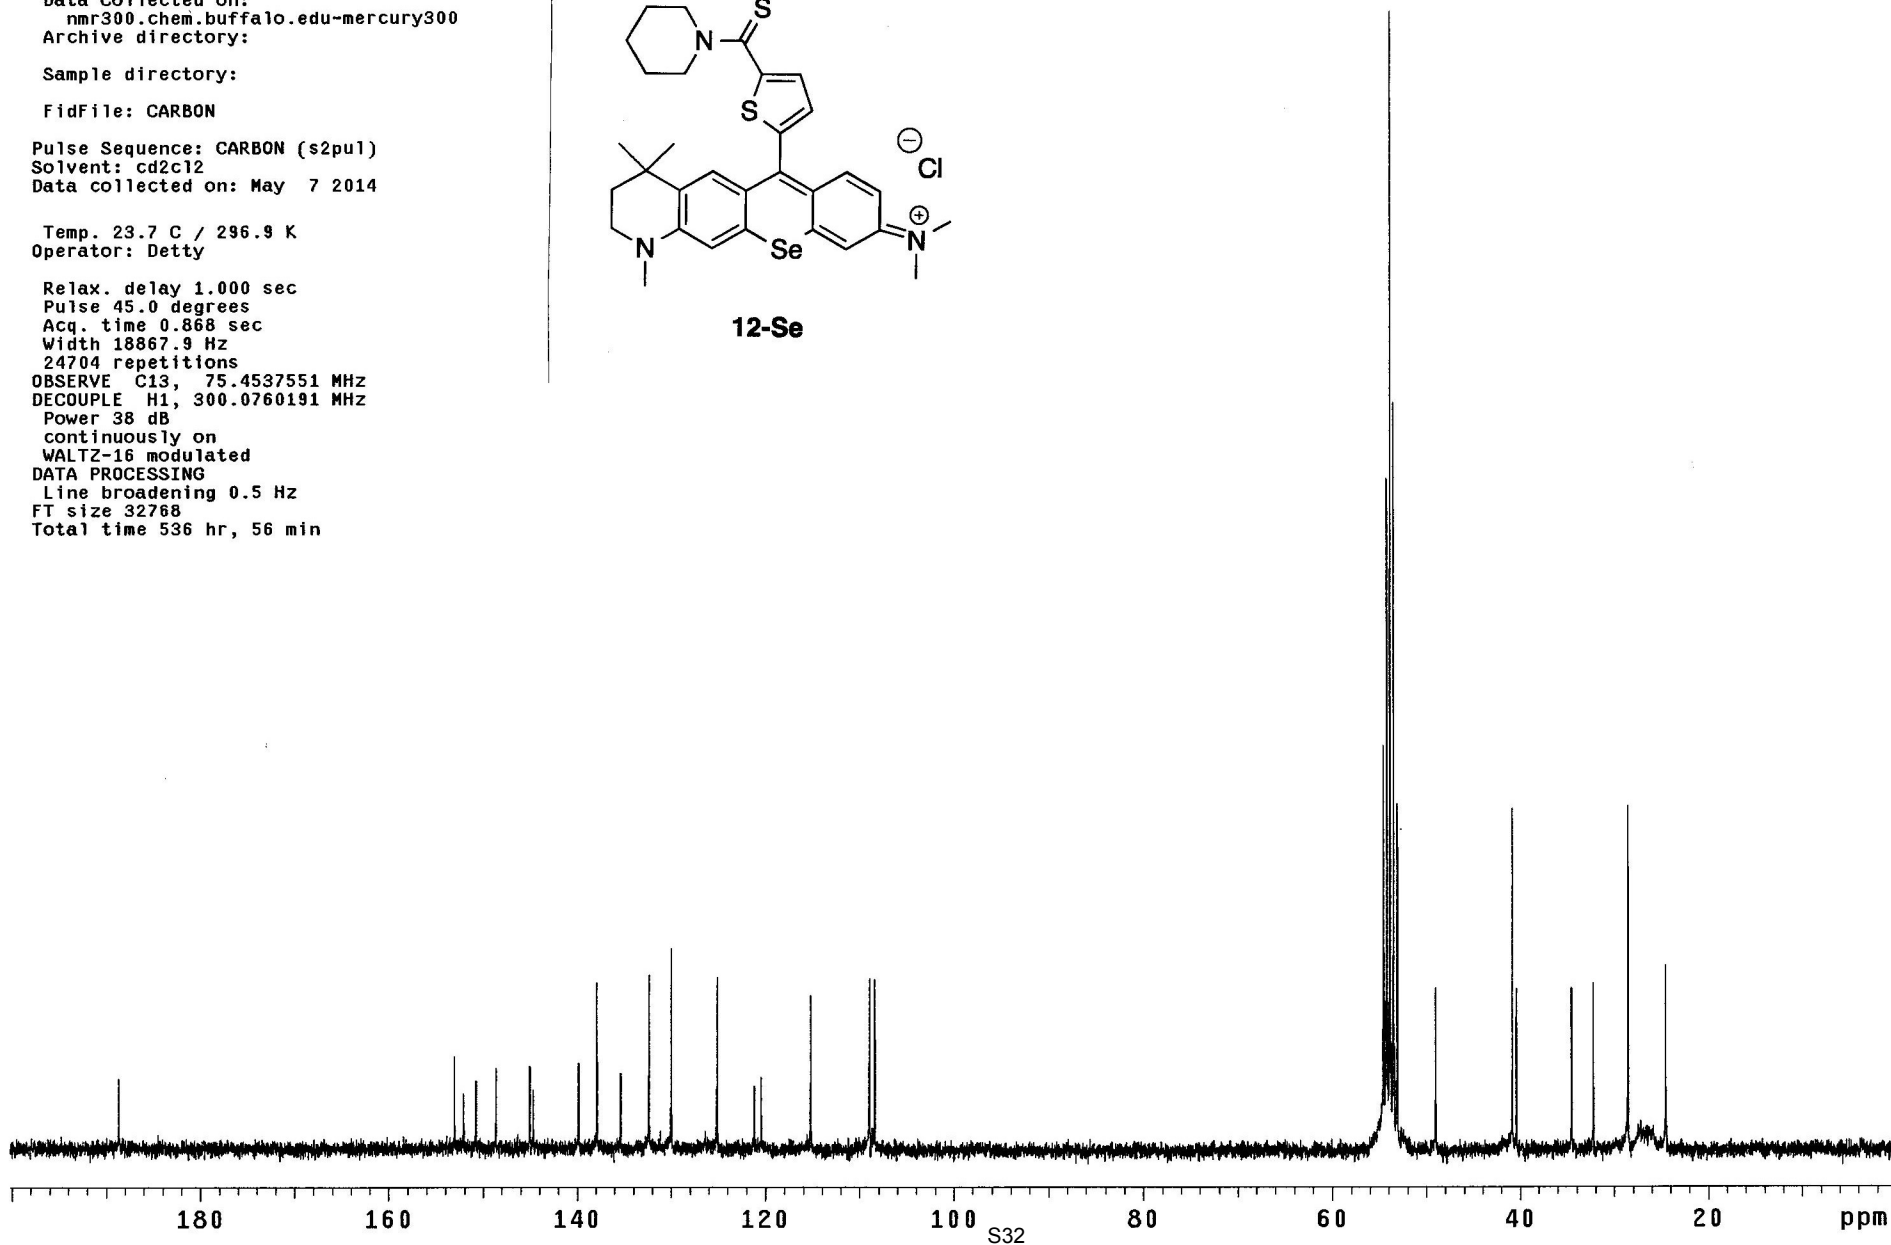

Supplement: jm501259v_si_001.pdf [file jm501259v_si_001.pdf]
